## **Prognostic Clinical and Biological Markers for Amyotrophic Lateral Sclerosis Disease Progression: Validation and Implications for Clinical Trial Design and Analysis**

**Authors:** Michael Benatar<sup>1</sup>, Eric A Macklin<sup>2</sup>, Andrea Malaspina<sup>3</sup>, Mary-Louise Rogers<sup>4</sup>, Eran Hornstein<sup>5</sup>, Vittoria Lombardi<sup>3</sup>, Danielle Renfrey<sup>4</sup>, Stephanie Shepheard<sup>4</sup>, Iddo Magen<sup>5</sup>, Yahel Cohen<sup>5</sup>, Volkan Granit<sup>1</sup>, Jeffrey M Statland<sup>6</sup>, Jeannine M Heckmann<sup>7</sup>, Rosa Rademakers<sup>8,9</sup>, Caroline A McHutchison<sup>10,11</sup>, Leonard Petrucelli<sup>9</sup>, Corey T McMillan<sup>12</sup>, and Joanne Wu<sup>1</sup> on behalf of the CReATe Consortium PGB1 Study Investigators

### **Affiliations:**

<sup>1</sup> Department of Neurology, University of Miami Miller School of Medicine, Miami, FL, USA

<sup>2</sup> Departments of Neurology and Medicine, Massachusetts General Hospital, Harvard Medical School, Boston, MA USA

<sup>3</sup> UCL Queen Square Motor Neuron Disease Center, UCL Queen Square Institute of Neurology, University College London, Queen Square, London, UK

<sup>4</sup> Flinders Health and Medical Research Institute, College of Medicine and Public Health, Flinders University, Adelaide, South Australia, Australia

<sup>5</sup> Department of Molecular Genetics and Molecular Neuroscience, Weizmann Institute of Science, Israel

<sup>6</sup> Department of Neurology, University of Kansas Medical Center, Kansas City, KS USA

<sup>7</sup> Division of Neurology, Department of Medicine, University of Cape Town, South Africa

<sup>8</sup> VIB Center for Molecular Neurology, Department of Biomedical Sciences, University of Antwerp, Antwerp, Belgium

<sup>9</sup> Department of Neuroscience, Mayo Clinic, Jacksonville, Florida, USA

<sup>10</sup> School of Philosophy, Psychology, and Language Sciences, The University of Edinburgh, Edinburgh, UK.

<sup>11</sup> Euan MacDonald Centre for Motor Neuron Disease Research, The University of Edinburgh, Edinburgh, UK

<sup>12</sup> Department of Neurology, University of Pennsylvania Perelman School of Medicine, Philadelphia, PA, USA

**Correspondence to:** Michael Benatar MD, PhD, or Joanne Wu, ScM, Department of Neurology, University of Miami Miller School of Medicine, 1120 NW 14 Street, CRB Suite 1300, Miami, FL, 33136, USA. Email: [mbenatar@miami.edu](mailto:mbenatar@miami.edu); or [jwu@miami.edu](mailto:jwu@miami.edu).

## Structured Summary (max 300)

1  
2  
3  
4  
5  
6  
7  
8  
9  
10  
11  
12  
13  
14  
15  
16  
17  
18  
19  
20  
21  
22  
23  
24  
25  
26  
27  
28  
29  
30  
31  
32  
33  
34

**Background.** With increasing recognition of the value of incorporating prognostic markers into amyotrophic lateral sclerosis (ALS) trial design and analysis plans, there is a pressing need to understand *which* among the prevailing clinical and biochemical markers have real value, and *how* they can be optimally used.

**Methods.** A subset of patients with ALS recruited through the multi-center Phenotype-Genotype-Biomarker study (clinicaltrials.gov: NCT02327845) was identified as “trial-like” based on meeting common trial eligibility criteria. Clinical phenotyping was performed by evaluators trained in relevant assessments. Serum neurofilament light (NfL) and phosphorylated neurofilament heavy (pNfH), urinary p75<sup>ECD</sup>, plasma microRNA-181, and an array of biochemical and clinical measures were evaluated for their prognostic value. Associations with functional progression were estimated by random-slopes mixed models of ALS functional rating scale-revised (ALSFRS-R) score. Associations with survival were estimated by log-rank test and Cox proportional hazards regression. Potential sample size savings from adjusting for given biomarkers in a hypothetical trial were estimated.

**Findings.** Baseline serum NfL is a powerful prognostic biomarker, predicting survival and ALSFRS-R rate of decline. Serum NfL <40pg/ml and >100pg/ml correspond to future ALSFRS-R slopes of ~0.5 and 1.5 points/month, respectively. Serum NfL also adds value to the best available clinical predictors, encapsulated by the European Network to Cure ALS (ENCALS) predictor score. In models of functional decline, the addition of NfL yields ~25% sample size saving above those achieved by inclusion of either clinical predictors or ENCALs score alone. The prognostic value of serum pNfH, urinary p75<sup>ECD</sup>, and plasma miR-181ab is more limited.

**Interpretation.** Among the multitude of biomarkers considered, only blood NfL adds value to the ENCALs prediction model and should be incorporated into analysis plans for all ongoing and future ALS trials. Defined thresholds of NfL might also be used in trial design, for enrichment or stratified randomisation, to improve trial efficiency.

**Funding.** NIH (U01-NS107027, U54-NS092091). ALSA (16-TACL-242).

**Key Words:** Prognostic biomarkers, Context-of-use, ALS clinical trials, Neurofilament

## 35 **Research in Context**

36

### 37 Evidence Before This Study

38 The phenotypic heterogeneity of ALS poses a challenge for clinical trials, making it more difficult  
39 to discern therapeutic effects of investigational agents amidst the noise of natural variability.  
40 Prognostic markers are important tools to help mitigate this issue. A host of clinical markers and  
41 putative biomarkers have been proposed to have prognostic value, but their relative utility,  
42 especially when considered jointly, and the practical implications of their use, have not been well  
43 defined.

44

### 45 Added Value of This Study

46 Using a trial-like population from a natural history study, in which clinical trial-grade phenotypic  
47 data and multi-modal biomarker data were collected, we show that a subset of clinical factors,  
48 encapsulated by the ENCALS predictive model score, and serum neurofilament light chain (NfL)  
49 are the most powerful prognostic markers when considering either ALSFRS-R functional decline  
50 or permanent assisted ventilation (PAV)/tracheostomy-free survival. Importantly, serum NfL adds  
51 prognostic value even after adjusting for the ENCALS score, yielding an additional sample size  
52 saving of ~27% in a hypothetical future clinical trial. While serum phosphorylated neurofilament  
53 heavy chain (pNfH), urinary p75<sup>ECD</sup>, and plasma miR-181ab each holds some prognostic value,  
54 when considered together with the ENCALS score and serum NfL, only p75<sup>ECD</sup> may yield  
55 additional but modest sample size saving.

56

### 57 Implication of All Available Evidence

58 Blood NfL is a validated biomarker for multiple contexts-of-use. As a prognostic marker, it should  
59 be used together with clinical predictors, such as the ENCALS predictive model score, in all  
60 ongoing and future ALS clinical trials. The utility of urinary p75<sup>ECD</sup> and plasma miR-181ab is less  
61 clear. Serum pNfH, as well as serum uric acid, albumin, creatinine, and C-reactive protein  
62 (CRP), provide no additional prognostic information.

63

## 64 **Introduction**

65 Clinical trials in the field of amyotrophic lateral sclerosis (ALS) must consider the phenotypic  
66 heterogeneity of disease as well as the related challenge that clinically meaningful outcomes,  
67 such as the rate of functional decline and survival, are typically insufficiently sensitive to detect  
68 therapeutic effect in the early- and mid-phases of drug development. Biofluid biomarkers that  
69 are fit-for-purpose, however, may help to meaningfully address this problem.<sup>1</sup> In patients with  
70 clinically manifest ALS (as opposed to the pre-symptomatic population at elevated risk for ALS,  
71 which is beyond the scope of this paper), *prognostic biomarkers* might be used in three broad  
72 ways to improve the design and analysis of clinical trials. From a study design perspective, they  
73 may be used as eligibility criteria to enrich for a population, in which a therapeutic effect might  
74 be most apparent, or to stratify randomisation. They may also be used analytically to adjust for  
75 phenotypic heterogeneity, thereby reducing the sample size needed to adequately power a trial  
76 using clinical outcome measures.<sup>2</sup> These approaches are not mutually exclusive, and indeed  
77 could be combined, depending on the goals of a particular trial. In addition, *response*  
78 *biomarkers* might be used to demonstrate target engagement or pharmacodynamic effect, and  
79 perhaps even serve as surrogates that are reasonably likely to predict a future clinical benefit.

80  
81 There remains, however, a significant gap between biomarker discovery, analytic validation, and  
82 preliminary reports of biomarker performance in samples of convenience on the one hand, and  
83 clinical validation on the other hand. The latter entails demonstrating the utility of a biomarker for  
84 a well-defined context-of-use in a large, carefully phenotyped clinical cohort.

85  
86 Prior studies have identified clinical parameters predictive of disease progression<sup>2</sup> or survival.<sup>2,3</sup>  
87 Moreover, among patients with ALS, neurofilament light chain (NfL) has emerged as the lead  
88 prognostic and response biomarker<sup>4-8</sup> for a number of reasons: NfL can reliably be measured  
89 in blood, there is a high correlation between blood and cerebrospinal fluid (CSF) concentrations,  
90 and empiric data support these contexts-of-use based on results from serum or plasma. There  
91 is, however, also persistent interest in the potential prognostic value of other biomarkers,  
92 including blood phosphorylated neurofilament heavy chain (pNfH),<sup>9</sup> urinary p75 neurotrophin  
93 receptor extracellular domain (p75<sup>ECD</sup>),<sup>10</sup> microRNA-181 (miR-181),<sup>11</sup> and an array of analytes,  
94 such as uric acid,<sup>12-20</sup> albumin,<sup>16</sup> creatinine,<sup>16,20,21</sup> and C-reactive protein (CRP),<sup>8,22,23</sup> that are  
95 routinely quantified in the clinical arena.

96

97 In this study, we sought to clinically validate the utility of putative prognostic biofluid biomarkers  
98 in the context of established clinical prognostic factors. The rationale is that a prognostic  
99 biomarker would only be worth quantifying if it adds value to what can be learned from known  
100 and readily available clinical parameters. Furthermore, a head-to-head comparison of clinical  
101 markers and molecular biomarkers revealed their relative contributions to clinical trial design,  
102 analysis, and result interpretation. Finally, we characterised the longitudinal trajectories of a  
103 subset of biomarkers, to inform their potential future use as response biomarkers. While  
104 prognostic clinical measures and biomarkers may have value in the clinical arena, such  
105 individual use of these markers is beyond the scope of the current investigation which is  
106 focused on the clinical trial utility of these markers,

107

## 108 **Methods**

### 109 *Study Population*

110 Patients with ALS were enrolled (between 2014 and 2019) at 12 centers in the United States and  
111 1 center in South Africa through the prospective Phenotype-Genotype-Biomarker (PGB) study  
112 (registered at [clinicaltrials.gov](https://clinicaltrials.gov) NCT02327845) of the Clinical Research in ALS and Related  
113 Disorders for Therapeutic Development (CReATe) Consortium. The PGB study enrolled 705  
114 patients with ALS (n=472), primary lateral sclerosis (n=47), progressive muscular atrophy  
115 (n=20), hereditary spastic paraplegia (n=162) and other related disorders (n=4). The goal was  
116 to evaluate participants serially over a period of 1.5-2 years to acquire longitudinal phenotypic  
117 data. Those with ALS, ALS-FTD and PMA were to be seen at Baseline, and Months 3, 6, 12 and  
118 18; those with PLS, HSP and multisystem proteinopathy were to be seen at Baseline and  
119 Months 6, 12, 18 and 24. Biological samples (blood and urine, as well as cerebrospinal fluid  
120 when willing) were collected at all study visits. Periodic medical record reviews, in addition to  
121 direct communication with patients, were performed as needed to ascertain the timing of  
122 survival endpoint (permanent assisted ventilation [PAV; non-invasive ventilation > 23 hours/day],  
123 tracheostomy, or death).

124

125 While PGB was designed to be broadly inclusive, the subset of patients with ALS who met  
126 common trial eligibility criteria were designated as “trial-like” and served as the basis for this  
127 report. Key inclusion/exclusion criteria included: diagnosis of ALS according to El Escorial  
128 criteria, permitting those with cognitive or behavioural impairment (ALSci or ALSbi, respectively),  
129 but excluding ALS-FTD; less than 3 years from onset of weakness; and an erect slow vital

130 capacity (SVC) of  $\geq 50\%$  predicted. All patients with ALS in PGB who met these criteria were  
131 included in the current report.

132

### 133 *Clinical Assessments*

134 The ALS Functional Rating Scale-Revised (ALSFRS-R), a 48-point scale that includes bulbar,  
135 gross motor, fine motor, and respiratory domains,<sup>24</sup> was the principal measure of functional  
136 status. Symptom onset was defined based on the first appearance of weakness or impaired  
137 motor function. The estimated rate of change in ALSFRS-R between symptom onset and  
138 baseline ( $\Delta$ FRS), was defined as (48-baseline ALSFRS-R/months since symptom onset).<sup>25</sup>  
139 Respiratory muscle function was quantified with slow vital capacity (SVC) in the erect position.  
140 Alternate versions of the North American version of the Edinburgh Cognitive and Behavioural  
141 ALS Screen (ECAS), including informant report, was used to evaluate cognitive and behavioural  
142 function.<sup>26</sup> All evaluators were trained and certified for the performance of each of these  
143 outcome measures. Biological sex, as well as race and ethnicity, were self-reported.

144

### 145 *Ethics*

146 The University of Miami institutional review board (IRB), which served as the central IRB for  
147 CReATe, approved the study for all US sites study (protocol # 20160603) and the University of  
148 Cape Town Health Sciences Human Research Ethics Committee approved the study in South  
149 Africa (REF number 165/2017). All participants provided written informed consent.

150

### 151 *Biological Samples*

152 Biological specimens were collected, processed, and stored according to strict standard  
153 operating procedures. Briefly, blood was collected in serum-separating BD vacutainers and  
154 allowed to clot upright at room temperature for 1–2 hours. Following centrifugation (1,750 g for  
155 10 min at 4°C), serum was aliquoted into cryogenic sterile freestanding conical microtubes  
156 (Nalgene or Bio Plas Inc.) and stored at –80°C. Plasma was collected in K2 EDTA tubes,  
157 centrifuged at 1,750g for 10 minutes at 4°C within 2 hours of collection, and aliquoted for  
158 storage at –80°C. Urine was collected in a sterile collection cup, gently swirled, and transferred  
159 to cryovials for immediate storage at -80°C.

160

### 161 *Biomarker and Genetic Assays*

162 Serum NfL and pNfH concentrations were quantified using the Simoa NfL and pNfH assays in  
163 the laboratory of an author (AM). Established protocols for NfL (Simoa Nf-L Advantage Kit-

164 102258, Quanterix) and pNfH (Simoa pNF-Heavy Discovery Kit - 102669) analysis were used.  
165 Each plate contained calibrators and quality controls. Samples were diluted to fall within the  
166 range of the standard curve.

167  
168 Urinary p75<sup>ECD</sup> was quantified by ELISA in the laboratory of an author (MLR) as previously  
169 described.<sup>10</sup> Briefly, urinary p75<sup>ECD</sup> was measured by a sandwich ELISA, that used a capture  
170 monoclonal antibody (MLR1 at 8mg/ml) made to the extracellular region of p75<sup>27</sup> in Carbonate-  
171 Carbonate coating buffer (Ph 9.6). Another monoclonal antibody (NGFR5) to p75<sup>28</sup> was used as  
172 the detection antibody and biotinylated as per the manufacturer's instructions (Thermo Fisher  
173 Scientific Australia, #UG283022) and used at 2.0mg/ml in the assay. Human p75<sup>ECD</sup> standard  
174 was from R&D Systems (Lys29-Asn250; #367-NR). BlockAce (BioRad, BUF-029) was used as  
175 blocking and sample buffer. The enzyme reaction was achieved using streptavidin horseradish  
176 peroxidase (Jackson ImmunoResearch Laboratories, #JIO16030084) diluted to 1.0 mg /ml and  
177 colour developed using tetramethylbenzidine (A:B; BioRad Australia, #1721067). The entire  
178 ELISA was accomplished as previously described<sup>29</sup> on a Hamilton Starlet Robot, integrated  
179 with a Biotek 405 washer, and an MD reader (450nm); two calibrator human urine samples with  
180 known p75<sup>ECD</sup> levels were included on each plate, and if the results from either had greater than  
181 20% coefficient of variation, the results from the plate were rejected. The results were reported  
182 as ng p75<sup>ECD</sup>/ ml urine and corrected by creatinine (mg/ml; measured by calorimetric method  
183 using Enzo Life Sciences Creatinine Kits (ADI-907-030A) as per the manufacturer's  
184 instructions). Samples with urinary creatinine below  $0.3 \pm 0.03$  mg/ml or above  $3.0 \pm 0.3$  mg ml  
185 were rejected as per World Health Organization guidelines<sup>30</sup>. Final results are reported as ng  
186 p75<sup>ECD</sup>/mg creatinine.

187  
188 Total RNA was extracted from plasma using the miRNeasy Micro Kit (Qiagen cat. 217084) and  
189 quantified with a Qubit fluorometer using the RNA Broad Range Assay Kit (Thermo Fisher  
190 Scientific cat. Q10210). For small RNA next-generation sequencing, libraries were prepared  
191 from 7.5 µg of total RNA using the QIAseq miRNA Library Kit (cat. 331505) and QIAseq miRNA  
192 NGS 48 Index IL (Qiagen cat. 331592) by an experimenter who was blinded to the identity of  
193 samples. Precise linear quantification of miRNA gained by UMIs of random 12 nucleotides after  
194 3' and 5' adapter ligation, within the reverse transcription primers. cDNA libraries were amplified  
195 by PCR for 22 cycles, with a 3' primer that includes a six-nucleotide unique index, followed by  
196 on-bead size selection and cleaning. Library concentration was determined with a Qubit  
197 fluorometer (dsDNA High Sensitivity Assay Kit, Thermo Fisher Scientific, cat. Q32851) and

198 library size with TapeStation D1000 (Agilent, cat. Catalog number: Q32851). Libraries with  
199 different indices were multiplexed and sequenced on a NovaSeq SP100 (Illumina), with 75-bp  
200 single read and 6-bp index read. Human miRNA sequences were mapped using GeneGlobe  
201 (Qiagen), normalized with the DESeq2 package and corrected for the library preparation batch.  
202 Plasma miR-181a and miR-181b were quantified by small RNA next-generation sequencing in  
203 the laboratory of an author (EH) as previously described,<sup>11</sup> and summarised as miR-181ab, the  
204 combined expression of miR-181a and miR-181b. Serum uric acid, albumin, creatinine, and  
205 CRP were assayed using the Roche Cobas C Analyzer in the Clinical Chemistry Laboratory at  
206 the University of Miami. All biomarker studies were performed blind to clinical outcomes.

207  
208 The presence of a *C9orf72* repeat expansion was determined in the laboratory of an author  
209 (RR) using a two-step protocol, including a fluorescent PCR fragment-length analysis and a  
210 repeat-primed PCR, with previously described oligos (ThermoFisher), as described elsewhere.<sup>31</sup>  
211 The PCR reactions (Qiagen) for both assays included Betaine and DMSO additives  
212 (MilliporeSigma). The FAM labeled products were run on a 3730xl DNA Analyzer (Applied  
213 Biosystems) and sized with Genescan 400 using Genemapper software (ThermoFisher).

214  
215 *Statistics*

216 Longitudinal change in ALSFRS-R total score, serum NfL, serum pNfH, and urinary p75<sup>ECD</sup> were  
217 estimated in unadjusted mixed model repeated-measures analyses with visits windowed to the  
218 closest planned assessment time (at 3, 6, 12, and 18 months) and in unadjusted mixed model  
219 random-slopes analyses using the observed assessment times. The repeated-measures model  
220 included a fixed effect of visit and assumed unstructured person-level variance-covariance  
221 among repeated observations. The random-slopes model included a fixed effect of time and  
222 assumed unstructured variance-covariance for the person-level random intercepts and slopes.  
223 Biomarker concentrations were log-transformed prior to analysis and estimates were back-  
224 transformed. Back-transformation of visit-specific estimates yield values on the original scale of  
225 measurement. Back-transformation of slopes or changes from baseline yield geometric mean  
226 ratios which were further transformed by subtracting 1 and multiplying by 100 to express as  
227 deviations in percentage change from 100%.

228  
229 We examined an array of clinical measures (sex, onset age, bulbar onset, diagnostic delay,  
230  $\Delta$ FRS [estimated rate of change in ALSFRS-R between symptom onset and baseline],<sup>25</sup>  
231 baseline age, ALSFRS-R total score, slow vital capacity, ECAS-derived scores, and ENCALs



232 predictor score) and biofluid biomarkers (serum NfL, serum pNfH, urinary p75<sup>ECD</sup>, serum uric  
233 acid, serum albumin, serum creatinine, serum CRP, plasma miR-181ab) as potential  
234 prognostics of rate of disease progression as measured by ALSFRS-R total score and of  
235 PAV/tracheostomy-free survival. We derived five scores from baseline ECAS assessments: total  
236 score, ALS-specific score, ALS non-specific score, and dichotomous designations of cognitive  
237 impairment (ALSci) and behavioural impairment (ALSbi) defined according to the revised Strong  
238 criteria<sup>32</sup> and implemented in the PGB study.<sup>33</sup> ALSci and ALSbi designations were restricted to  
239 English-speaking participants for whom robust normative data permitted reliable designation.<sup>26</sup>  
240 The ENCALS linear predictive model score<sup>3</sup> (hereinafter “ENCALS predictor score” or  
241 “ENCALS score”) combines information from 8 clinical variables ( $\Delta$ FRS, bulbar onset,  
242 diagnostic delay [months from symptom onset to diagnosis], age at onset, El Escorial definite  
243 ALS, presence of FTD, presence of a *C9orf72* repeat expansion, and percent predicted vital  
244 capacity). Plasma miR-181ab was evaluated as a continuous measure, split at the median  
245 (24,590 UMI in the current study), and as defined by Magen et al<sup>11</sup> where miR181-ab was  
246 defined as a poor prognostic when above the threshold of 39,300 UMI among those in the  
247 middle tertile of NfL concentration (NfL 59-109.8pg/ml)<sup>11</sup>, and as defined by Magen et al but  
248 using the median miR181ab value and the middle NfL tertile (44.8-80.8pg/ml) from the current  
249 study.

250  
251 Prognostic markers were assessed for their ability to predict the rate of progression in ALSFRS-  
252 R total score in random-slopes analyses and to predict PAV/tracheostomy-free survival by  
253 Kaplan-Meier product-limit estimates and by Cox proportional hazards regression. In survival  
254 analyses, time at risk began at the baseline visit (time zero) and continued to time last known  
255 alive or time of PAV, tracheostomy, or death, if observed. Each model included one prognostic.  
256 Continuous prognostics were evaluated both as continuous predictors after standardizing to unit  
257 variance and when divided into quartiles. We focused on analyses after dividing prognostics into  
258 quartiles (or fewer levels – e.g., for binary measures, where only 2 levels are possible) to avoid  
259 the strong assumption of a linear association with rate of progression and survival across the full  
260 range of a given prognostic and to permit comparison of all prognostics in a common  
261 framework. Models were either unadjusted, adjusted for established core clinical predictors  
262 (bulbar onset,  $\Delta$ FRS, and diagnostic delay for functional decline; plus baseline age for survival),  
263 adjusted for ENCALS predictor score, or adjusted also for serum NfL. The adjusted models  
264 sharpened estimates by accounting for known sources of variation and addressed whether a  
265 given prognostic provided new information independent of known predictors of progression and

266 survival. Wald confidence intervals were used for estimates from random-slopes models.

267 Complementary log-log confidence intervals were used for estimates of median survival time.

268 Profile likelihood confidence intervals were used for estimates of hazard ratios.

269

270 In addition to estimating the clinical utility of each potential prognostic biomarker, we quantified  
271 the proportional sample size saving that would result from adjusting for a given biomarker in a  
272 hypothetical clinical trial. Reductions in sample size requirements based on a normal  
273 approximation for a hypothetical clinical trial testing for slowing of ALSFRS-R progression,  
274 analyzed in a random slopes model, were estimated based on reductions in standard error  
275 estimates of the estimated slopes and resulting increases in the effect size after inclusion of a  
276 given prognostic marker as a linear predictor. The proportional savings in sample size assume a  
277 consistent but arbitrary allocation ratio, type 1 error control, and power between designs and an  
278 assessment schedule similar to the present cohort. For any given choice of allocation ratio, type  
279 1 error control, and power, the relative sample size required for two trials with equivalent  
280 assessment schedule differs only as a function of the ratio of the respective effect sizes for tests  
281 of the primary outcome, in the present case the estimated slope of ALSFRS-R. Note that effect  
282 size ratios rather than variance ratios were used due to small variation in estimated slopes when  
283 adding covariates.

284

285 A post-hoc analysis of the association between serum NfL and rate of progression in ALSFRS-R  
286 total score was performed using a cubic smoothing spline through the empirical Bayes ALSFRS-  
287 R slope estimates from an unadjusted random-slopes analysis and using a partial-linear spline  
288 in a longitudinal random-slopes analysis. Knots for the partial-linear spline were chosen post-  
289 hoc, based on visual inspection, at 40 and 100 pg/mL to approximate the shape of the cubic  
290 smoothing spline.

291

292

293 Analyses were performed using SAS (version 9.4, SAS Institute, Cary NC) and R (version 4.0.3,  
294 R Foundation for Statistical Computing, Vienna, Austria). Comparison-wise p-values are  
295 reported with nominal significance at two-tailed  $p < 0.05$ . Results significant after correction by  
296 Holm-Bonferroni stepdown adjustment for multiple comparisons over 28 prognostic markers are  
297 indicated.

298

299 *Role of Funders*

300 The funders of the study had no role in study design, data collection, statistical analysis, results  
301 interpretation, or writing of the report.

302

## 303 **Results**

### 304 *Study Population*

305 A total of 203 patients with ALS were included, with a mean ( $\pm$ SD) age of 57.1 ( $\pm$ 12) years and a  
306 slight male preponderance (55%). A genetic cause of ALS was identified in 24 (12%), most  
307 commonly a *C9orf72* hexanucleotide repeat expansion (n=20; 10%). Median disease duration  
308 (time since symptom onset) at baseline was 14.4 months, with a mean SVC of 85% ( $\pm$ 17)  
309 predicted (Table 1a). ALSFRS-R declined by an average ( $\pm$ SE) of 0.89 ( $\pm$ 0.05) points/month  
310 (Figure 1a) with median (Q1-Q3) follow-up of 10.1 (5.8-16.3) months. SVC declined by an  
311 average ( $\pm$ SE) of 1.8% ( $\pm$ 0.15) predicted per month. 93 (46%) patients reached a survival  
312 endpoint (PAV, tracheostomy, or death), with a median (Q1-Q3) survival time of 30.1 (17.4-47.7)  
313 months observed from follow-up of 17.4 (10.6-29.9) months. 110 patients were censored (25  
314 study completion, 15 loss to follow-up, 11 withdrawal/dropout, and 59 administrative study  
315 closure).

316

### 317 *Biomarker Profiles*

318 Baseline serum NfL concentrations ranged from 9 to 214 pg/mL (Table 1b) and correlated with  
319 subsequent rates of ALSFRS-R decline (Spearman  $r=-0.57$ , 95% CI [-0.66, -0.47],  $p<0.0001$ ,  
320 Figure 1b). Over the course of follow-up, serum NfL increased by an average (95% CI) of 0.98%  
321 [0.57%, 1.38%] per month (Table 2, Figure 2a). Baseline serum pNfH concentrations ranged  
322 from 3.4 to 4,177 pg/mL (Table 1b) and increased by an average of 0.45% [-0.12%, 1.03%] per  
323 month (Table 2, Figure 2b). Baseline urinary p75<sup>ECD</sup> levels ranged from 1.5 to 16.2 ng/mg  
324 creatinine (Table 1b) and increased by an average of 2.59% [2.01%, 3.17%] per month (Table 2,  
325 Figure 2c). Baseline plasma miR-181ab (product of miR-181a and miR-181b) concentration  
326 ranged from 2,875 to 431,004 unique molecular identifiers (UMIs) (Table 1b). Baseline  
327 concentrations of serum uric acid, albumin, creatinine, and CRP are summarised in Table 1b.  
328 Baseline biomarker results, stratified by *C9orf72* status and by sex are summarised in eTable 1  
329 and eTable 2 respectively, with longitudinal changes in biomarkers stratified by sex in eTable 3.  
330 Correlations among all prognostics at baseline are summarised in eTable 4.

331

### 332 *Prognostic Markers for Survival*

333 In univariate models, the strongest predictors of survival were the ENCALS score, baseline  
334 serum NfL, and  $\Delta$ FRS. Median survival among those with ENCALS predictor scores in the  
335 lowest vs. highest quartiles (i.e., lowest vs. highest predicted risk of PAV/tracheostomy-free  
336 survival) were 48 vs. 17 months (Table 3, Figure 3a). Median survival among those with  $\Delta$ FRS  
337 slopes in the lowest vs. highest quartiles (i.e., slowest vs. fastest pre-baseline slope) were 47  
338 vs. 17 months (Table 3, Figure 3b). Median survival among those with baseline NfL  
339 concentrations in the lowest vs. highest quartiles were 49 vs. 17 months (Table 3, Figure 3c).  
340 Median survival among those with baseline miR181ab above vs. below 24,590 UMI were. 23 vs.  
341 35 months (Table 3, Figure 3d). Bulbar onset, baseline ALSFRS-R, and baseline SVC  
342 %predicted also predicted survival (Table 3).

343  
344 In Cox proportional hazards models of time to death or equivalent, we evaluated the prognostic  
345 utility of each clinical and biofluid marker when added as quartiles to multivariate models that  
346 included either a core set of clinical predictors (bulbar,  $\Delta$ FRS, and diagnostic delay) or the  
347 ENCALS predictor score (Table 3). Results from models with prognostic measures added as  
348 linear terms are summarised in eTable 5. When a given prognostic is included both as quartiles  
349 and as a linear term among the covariates, the results presented in Table 3 describe any non-  
350 linearity in the relationship with survival. Serum NfL remained the strongest predictor. For  
351 example, in a model that already includes the ENCALS predictor score, the hazard ratio (HR)  
352 for the fourth vs. first quartile values of NfL is 7.3 (Table 3). The addition of NfL as a linear term  
353 to an ENCALS-adjusted Cox model, yields a HR of 1.83 for every 1 standard deviation increase  
354 in NfL (eTable 5). To examine the prognostic value of plasma miR-181ab in these multivariate  
355 models, we considered multiple analytic approaches. The previously published approach, in  
356 which a higher miR-181ab is categorised as poor prognostic only for the middle tertile of NfL<sup>11</sup>,  
357 reveals no prognostic value beyond that conferred by NfL alone, whether tertiles from a prior  
358 study or the current cohort were used. By contrast, dichotomising at the median value in this  
359 cohort (but not the threshold value identified in a prior study) added some prognostic value –  
360 with HRs of 1.65 and 1.73, respectively, when miR-181ab was added to the core set of clinical  
361 predictors and the ENCALS predictor score (Table 3). None of the other biomarker candidates  
362 considered – serum uric acid, albumin, creatinine, or CRP – added prognostic value in survival  
363 analyses (Table 3). Similarly, none of our measures of cognitive/behavioural impairment  
364 predicted survival (Table 3).

365  
366 *Prognostic Markers for Functional Decline*

367 In univariate random-slope models of ALSFRS-R decline,  $\Delta$ FRS, diagnostic delay, ENCALS  
368 score, baseline NfL, and baseline pNfH were identified as prognostic markers (Table 4).  
369 Although not developed for predicting functional decline, the ENCALS model predicted  
370 differential rates of disease progression that ranged from -0.57 to -1.27 points/month among  
371 those with the lowest vs. highest quartile ENCALS scores (Table 4, unadjusted). NfL is also a  
372 powerful predictor of future functional decline, with slopes ranging from -0.41 to -1.49  
373 points/month among those with the lowest vs. highest quartiles NfL values (Table 4). Results  
374 from models with prognostic measures added as linear terms are summarised in eTable 6.

375  
376 In multivariate models that already incorporate the ENCALS predictor score, quartiles of  
377 baseline serum NfL added substantial prognostic value, with the rate of ALSFRS-R progression  
378 ranging from -0.44 to -1.44 points/month among those with the lowest vs. highest quartile  
379 values.  $\Delta$ FRS and serum pNfH added much less prognostic value. Irrespective of the analytic  
380 approach, plasma miR-181ab did not add prognostic value beyond that conferred by serum NfL  
381 (Table 4). None of the other clinical markers (including measures of cognitive and behavioural  
382 impairment), or biomarker candidates considered added prognostic value in random-slopes  
383 models of ALSFRS-R functional decline (Table 4).

384  
385 *Impact of Prognostic Markers on Sample Size Savings for Future Clinical Trials*

386 For the outcome measure of ALSFRS-R slope, the ENCALS model yields a 9% sample size  
387 saving, compared to 30.9% for NfL alone (Table 5). The combination of ENCALS and NfL yields  
388 a ~34% saving in sample size. In random slope models of ALSFRS-R that incorporate either the  
389 core clinical predictors plus NfL, or ENCALS predictor score plus NfL, the addition of urinary  
390 p75<sup>ECD</sup> yields an additional ~4% sample size saving, suggesting a modest additional utility of  
391 this prognostic marker (with the caveat that this conclusion is based on incomplete baseline  
392 data for p75<sup>ECD</sup> in this sample). The addition of serum pNfH or plasma miR-181ab, however,  
393 yielded no additional sample size saving, indicating that in multivariate models that incorporate  
394 clinical predictors and NfL, these latter biomarkers add little prognostic value when the ALSFRS-  
395 R slope is the outcome measure (Table 5). None of the other clinical measures (including those  
396 of cognitive or behavioural impairment) or biomarker candidates yielded sample size savings  
397 when considered as prognostic markers.

398  
399 *A Practical Approach to Incorporating NfL into Trial Design*

400 The relationship between baseline NfL and future rate of functional decline, as measured by the  
401 slope of the ALSFRS-R, is not linear (Figure 1b). In this dataset, the sigmoidal relationship  
402 yields an estimate of thresholds that might be used either as eligibility criteria (for trial  
403 enrichment) or to facilitate stratifying randomisation (to ensure equal balance of NfL-predicted  
404 faster and slower disease progression rates across treatment groups). Baseline NfL levels <40  
405 pg/mL corresponded to a future ALSFRS-R slope of ~0.5 points/month (i.e. slow progression),  
406 whereas baseline levels >100 pg/mL corresponded to a future ALSFRS-R slope of ~1.5  
407 points/month (i.e., fast progression). In the range from 40 to 100 pg/mL, ALSFRS-R slope  
408 declines quickly for each incremental increase in baseline serum NfL concentration.

409

## 410 **Discussion**

411 This study comprehensively evaluated leading biochemical *prognostic* biomarker candidates,  
412 alone and in combination, and examined their potential utility when combined with established  
413 and emerging clinical predictors. This multivariate approach is essential to achieving a fuller  
414 understanding of the practical value of candidate prognostic markers. Moreover, mindful that  
415 observational studies typically enroll slower progressing patients, for greatest relevance to the  
416 design and analysis of future trials we *a priori* focused our analysis on a trial-like population, the  
417 subset of PGB participants who met clinical trial eligibility criteria. Absent a similar biomarker  
418 study that utilizes the placebo group from clinical trial(s), our approach is the most robust to date  
419 in providing clear answers about the utility of an array of prognostic biomarker candidates.

420

421 Serum NfL is a robust predictor of disease progression, whether the outcome is ALSFRS-R rate  
422 of decline or survival time. While the overlap in survival curves for the second and third quartiles  
423 of NfL (Figure 3c), for example, suggests limited prognostic value for NfL in the mid-range of  
424 values when predicting survival, the relationship between NfL and future rate of functional  
425 decline is steepest in the mid-range of values (Figure 1b). Moreover, not only does NfL provide  
426 greater prognostic value than the ENCALIS predictor score, the combination of NfL and the  
427 ENCALIS score yields more prognostic value than either NfL or ENCALIS score alone. (Of note,  
428 we have not fully explored potential transformations of NfL data to optimize its performance as a  
429 prognostic marker beyond those displayed in Figure 1. Future research using fractional  
430 polynomials or regression splines might further improve the value of NfL as a prognostic<sup>34</sup>. We  
431 also acknowledge that some information is lost by dividing a continuous prognostic into  
432 categories and that cut points for quartiles will vary from one dataset to another. The quartiles  
433 provided here are intended to be descriptive of potential non-linearity in associations, not to be

434 prescriptive of future handling of such prognostics.) Serum pNfH, on the other hand, has some  
435 prognostic value for functional decline, but not survival; and in models already adjusting for  
436 clinical predictor(s) and NfL, it yielded no additional prognostic value. The prognostic utility of  
437 urinary p75<sup>ECD</sup> and plasma miR-181ab are more nuanced, with p75<sup>ECD</sup> yielding some sample  
438 size saving when combined with clinical predictor(s) and NfL (recognizing that this conclusion is  
439 based on incomplete baseline data for p75<sup>ECD</sup> in this sample). Serum uric acid, albumin,  
440 creatinine, and CRP have no value as prognostic biomarkers irrespective of the outcome used.  
441 Similarly, baseline cognitive and behavioural impairment, based on the ECAS, does not add  
442 prognostic value.

443  
444 While the greater prognostic value of blood NfL (than pNfH) may reflect a more critical role for  
445 the NfL isoform in maintaining neuroaxonal structure and function under pathological conditions,  
446 this may also reflect the better analytic performance of the blood NfL immunoassay. pNfH  
447 assays in blood are still hampered by a matrix effect and lack of appropriate binding  
448 reagents.<sup>35,36</sup> Analytic considerations may also be relevant to the performance of urinary p75<sup>ECD</sup>,  
449 which has not yet achieved the same degree of analytic validation as NfL assays.<sup>37</sup>

450  
451 The design of this study has both strengths and weaknesses. As an observational study rather  
452 than a clinical trial, a limitation is that the intervals between study visits were wide (and  
453 variable), requiring us to window study visits around defined time points for the repeated-  
454 measures analyses (see eTable 8). It is for this reason that we used observed times in a random  
455 slopes analyses to estimate sample size savings from incorporation of various potential  
456 prognostic biomarkers, despite the FDA's preference for a repeated-measures approach for  
457 clinical trials where study visit windows are typically more rigidly controlled. Of note, many ALS  
458 clinical trials have historically used this approach<sup>38-40</sup>. Moreover, the estimates themselves  
459 depend on the duration of follow-up available at the time of analysis and would likely differ over  
460 shorter or longer intervals. In addition, due to premature study closure (for administrative  
461 reasons between funding cycles) and some attrition, follow up data at 3-, 6-, and 12-month were  
462 available for only 85%, 80% and 52% of participants, respectively – resulting in less precise  
463 estimates of ALSFRS-R values beyond 6 months. Vital status after a participant's last visit was  
464 ascertained based on clinic notes at some sites, with potentially more complete data collection  
465 on deaths; this leads to downward bias in estimates of absolute survival percentages but is  
466 unlikely to bias estimates of prognostic value. Strengths of this study include the *a priori*  
467 selection of a trial-like population, the rigorous attention to the quality of phenotypic data, and

468 the multimodal analysis of putative prognostic biomarkers. Of note, our claims of prognostic  
469 utility do not imply any assumption of a causal relationship between a given prognostic and  
470 progression rate or survival.

471  
472 We also acknowledge the limitations of the ALSFRS-R as an outcome measure in clinical trials,  
473 notably the fact that it is not uni-dimensional (meaning that items on the scale measure domains  
474 other than functional status)<sup>41</sup>; that a one-point change can represent a variable amount of  
475 functional change depending on the question and the item<sup>42</sup>, providing a rationale for reporting  
476 the domain specific sub-scores of the ALSFRS-R<sup>43</sup>; and that the decline in ALSFRS-R is not  
477 linear across the entire course of disease<sup>44</sup>. Notwithstanding these considerations, the  
478 ALSFRS-R is typically linear during the follow-up period encompassed by clinical trials<sup>45</sup>, and  
479 remains the principal functional outcome measure used in ALS clinical trials<sup>46</sup>.

480  
481 While the longitudinal trajectory of a subset of the biomarkers was not the major focus of this  
482 investigation, we have observed subtle increases in NfL and pNfH over time (in contrast to the  
483 conventional wisdom that these are largely stable<sup>8,47-50</sup>). Also noteworthy is the marked  
484 increase and relatively consistent trajectory of urinary p75<sup>ECD</sup> (compared to NfL and pNfH),  
485 suggesting that urinary p75<sup>ECD</sup> might have value as a response or monitoring biomarker.

486  
487 It should be acknowledged that our evaluation of changes in biomarkers over time—and of the  
488 prognostic value of these biomarkers—has been conducted at a population (or group) level.  
489 While statistically robust, conclusions from a population cannot necessarily be extrapolated to  
490 individual patients. NfL and other biomarkers considered in our analyses, therefore, remain  
491 largely research tools, with more limited (and speculative) value in the clinic setting when  
492 applied to individuals.

493  
494 While confirmatory studies with larger sample sizes would add confidence to our conclusions,  
495 the results of this study are nevertheless immediately relevant to all ongoing and future ALS  
496 trials, even in the absence of formal qualification through regulatory agencies such as the  
497 FDA.<sup>51</sup> Our findings are especially relevant to trials with 6-month treatment duration, the period  
498 for which we have more complete data. First, baseline NfL should be incorporated into the  
499 analysis plan for all clinical trials as a prognostic biomarker, whether functional decline or  
500 survival is used as the primary outcome. Second, how one incorporates baseline NfL into trial  
501 design – either as an eligibility criterion or as a stratification factor – depends on the purpose.



502 For example, if the goal is to enrich the trial population for either faster or slower progressing  
503 patients, or to stratify randomisation based on anticipated rate of disease progression, then NfL  
504 levels above or below a defined threshold might be used. Our data suggest serum NfL  
505 thresholds of <40pg/mL for slow progressors and >100pg/mL for fast progressors. Between 40-  
506 100pg/ml, given the steep relationship between NfL increase and faster future rate of ALSFRS-  
507 R decline, multiple NfL strata may be required for randomisation (as permitted by study sample  
508 size), in order to adequately control for heterogeneity of predicted disease progression rate.  
509 (Importantly, the same threshold may not hold for predicting future survival.) Third, in a  
510 hypothetical clinical trial with ALSFRS-R slope as the outcome, except for urinary p75<sup>ECD</sup>, other  
511 putative prognostic biomarkers yield very little in the way of sample size saving beyond those  
512 conferred by the combination of established clinical predictor(s) and NfL. While incorporation of  
513 plasma miR-181ab in such a model does not improve prediction of future rates of ALSFRS-R  
514 decline or yield additional sample size savings, it may have some value in predicting survival.  
515  
516 This study exemplifies the critical importance of a multivariate approach to evaluating new  
517 prognostic markers and highlights the necessity for novel markers to demonstrate value added  
518 to existing predictors. Moreover, the implication of our finding that clinical predictors  
519 (encapsulated, for example, by the ENCALS score) and blood-based measurement of NfL are  
520 strong predictors of disease progression, is that both should be incorporated into all ongoing  
521 and future Phase 2 and Phase 3 ALS trials. Moreover, the dual use of NfL as a prognostic *and*  
522 response biomarker will aid interpretation of Phase 2 trial results and facilitate go/no-go  
523 decisions about advancing experimental agents to Phase 3. Collectively, these modifications to  
524 ALS trial design and analysis should accelerate the pace of ALS therapy development.  
525  
526

527 **Contributors**

528 MB: Study concept/design, study oversight, major role in acquisition of data,  
529 analysis/interpretation of data, access to and verification of underlying data, and  
530 drafting/revising the manuscript for content.

531 EAM: Analysis/interpretation of data, access to and verification of underlying data, and  
532 drafting/revising the manuscript for content.

533 AM: Study concept/design, major role in acquisition of data, and drafting/revising the  
534 manuscript for content.

535 MLR: Study concept/design, major role in acquisition of data, and drafting/revising the  
536 manuscript for content.

537 EH: Major role in acquisition of data and drafting/revising the manuscript for content.

538 VL: Major role in acquisition of data.

539 DR: Major role in acquisition of data.

540 IM: Major role in acquisition of data and drafting/revising the manuscript for content.

541 YC: Major role in acquisition of data.

542 VG: Major role in acquisition of data.

543 JS: Major role in acquisition of data.

544 JH: Major role in acquisition of data.

545 RR: Major role in acquisition of data and editing the manuscript for content.

546 CAM: Major role in generation of summary cognitive/behavioural data.

547 LP: Study concept/design and editing the manuscript for content.

548 CM: Major role in acquisition of data and editing the manuscript for content.

549 JW: Study concept/design, study oversight, major role in acquisition of data,  
550 analysis/interpretation of data, access to and verification of underlying data, and  
551 drafting/revising the manuscript for content.

552 All authors have read and approved the final version of the manuscript.

553 CReATe Consortium PGB Investigators contributed to data collection.

554

555 **Data Sharing Statement**

556 Following publication, de-identified participant data and a data dictionary defining each field in  
557 the dataset, will be made available following request to the corresponding authors and upon  
558 execution of a data access agreement. Additional study related documents are not available.

559 **Declaration of Interests**

560 MB reports grants from the NIH (U01NS107027, U54NS092091) and the ALS Association (16-  
561 TACL-242) in support of this work. He is also an unpaid member of the Board of Trustees  
562 for the ALS Association. He has served as a consultant to Alector, Alexion, Annexon,  
563 Arrowhead, Biogen, Cartesian, Denali, Eli Lilly, Horizon, Immunovant, Novartis, Roche,  
564 Sanofi, Takeda, UCB, and UniQure.

565 EAM reports grants from the NIH (U01NS107027, U54NS092091). He also serves as a  
566 consultant to Annexon, Biogen, Bial Biotech, Cortexyme, Chase Therapeutics, Enterin, nQ  
567 Medical, Partner Therapeutics, Stoparkinson Healthcare, and UCB. He has served on  
568 DSMBs for NeuroSense Therapeutics, Novartis, and Sanofi.

569 AM reports grants from the NIH (U01NS107027). He has also provided consulting services to  
570 Roche, Pfizer, and Accure Therapeutics.

571 MLR reports support from grants from the NIH (U01NS107027, U54NS092091) and FightMND.

572 EH has nothing to declare.

573 VL has nothing to declare.

574 DR has nothing to declare.

575 SS has nothing to declare.

576 IM has nothing to declare.

577 YC has nothing to declare.

578 VG currently is an employee of Biohaven Pharmaceutical Inc.

579 JS receives research funding from the NIH< MDA, FSHD Society, Friends of FSH Research,  
580 and FSHD Canada. He also serves as a consultant or on scientific advisory boards for  
581 Avidity, Fulcrum, Dyne, Armatus, Epic Bio, Roche, Lupin, and Entrada

582 JH has nothing to declare.

583 RR reports grants from the NIH (U54NS092091) in support of this work. She is also an unpaid  
584 member of the Medical Advisory Board of the Association for Frontotemporal Dementias  
585 (AFTD) and a paid member of the Scientific Advisory Board of the Kissick Family  
586 Foundation FTD Grant Program

587 CAM reports funding from the ALS Association and the NIH (U54NS092091).

588 LP reports support from the Mayo Clinic Foundation and grants from the National Institute on  
589 Aging (5P30AG0062677, U19AG063911) the National Institute of Neurological Disorders  
590 and Stroke (U54NS123743, R35NS097273, P01NS084974) and Target ALS Foundation.

591 CM reports grants from the NIH (AG066597, AG076411, AG066152, AG072979, NS109260,  
592 NS092091), Department of Defense, and support from the Penn Institute on Aging,  
593 Decrane Family PPA Fund, and Newhouse Fund.2

594 JW reports funding from the NIH (U01NS107027, U54NS092091) and the ALS Association (16-  
595 TACL-242) in support of this work.

596  
597 The CReATe Consortium (U54NS092091) is part of the NIH Rare Diseases Clinical Research  
598 Network (RDCRN), an initiative of the Office of Rare Diseases Research (ORDR), NCATS. This  
599 Consortium is funded through a collaboration between NCATS and the NINDS. This work was  
600 also supported by a Clinical Trial Readiness grant (U01NS107027) from NINDS and by a grant  
601 from the ALS Association to support the CReATe Biorepository (grant ID 16-TACL-242).

602

### 603 **Acknowledgements**

604 The authors thank participants in the CReATe Consortium's Phenotype-Genotype-Biomarker (PGB1)  
605 study; research staff at each clinical site; and the CReATe Consortium project management and data  
606 management teams, genomics sub-core, and biorepository. The authors also thank members of the  
607 University of Miami Laboratory for Clinical and Biological Studies for assistance with clinical chemistry  
608 assays.

609

610

611

## 612 References

- 613
- 614 1. Benatar M, Boylan K, Jeromin A, et al. ALS biomarkers for therapy development: State of the field  
615 and future directions. *Muscle & nerve* 2016; **53**(2): 169-82.
- 616 2. Witzel S, Frauhammer F, Steinacker P, et al. Neurofilament light and heterogeneity of disease  
617 progression in amyotrophic lateral sclerosis: development and validation of a prediction model to  
618 improve interventional trials. *Transl Neurodegener* 2021; **10**(1): 31.
- 619 3. Westeneng HJ, Debray TPA, Visser AE, et al. Prognosis for patients with amyotrophic lateral  
620 sclerosis: development and validation of a personalised prediction model. *Lancet Neurol* 2018;  
621 **17**(5): 423-33.
- 622 4. Benatar M, Zhang L, Wang L, et al. Validation of serum neurofilaments as prognostic and potential  
623 pharmacodynamic biomarkers for ALS. *Neurology* 2020; **95**(1): e59-e69.
- 624 5. Miller TM, Cudkovicz ME, Genge A, et al. Trial of Antisense Oligonucleotide Tofersen for SOD1 ALS.  
625 *The New England journal of medicine* 2022; **387**(12): 1099-110.
- 626 6. Benatar M, Wu J, Turner MR. Neurofilament light chain in drug development for amyotrophic  
627 lateral sclerosis: a critical appraisal. *Brain : a journal of neurology* 2022.
- 628 7. Huang F, Zhu Y, Hsiao-Nakamoto J, et al. Longitudinal biomarkers in amyotrophic lateral sclerosis.  
629 *Annals of clinical and translational neurology* 2020; **7**(7): 1103-16.
- 630 8. Thompson AG, Gray E, Verber N, et al. Multicentre appraisal of amyotrophic lateral sclerosis  
631 biofluid biomarkers shows primacy of blood neurofilament light chain. *Brain Commun* 2022; **4**(1):  
632 fcac029.
- 633 9. Boylan KB, Glass JD, Crook JE, et al. Phosphorylated neurofilament heavy subunit (pNF-H) in  
634 peripheral blood and CSF as a potential prognostic biomarker in amyotrophic lateral sclerosis. *J*  
635 *Neurol Neurosurg Psychiatry* 2012.
- 636 10. Shephard S, Wu J, Cardoso M, et al. Urinary p75 extracellular domain; A biomarker for  
637 prognosis, progression and pharmacodynamic effect in ALS. *Neurology* 2017; **88**(12): 1137-43.
- 638 11. Magen I, Yacovzada NS, Yanowski E, et al. Circulating miR-181 is a prognostic biomarker for  
639 amyotrophic lateral sclerosis. *Nature neuroscience* 2021; **24**(11): 1534-41.
- 640 12. Keizman D, Ish-Shalom M, Berliner S, et al. Low uric acid levels in serum of patients with ALS:  
641 further evidence for oxidative stress? *Journal of the neurological sciences* 2009; **285**(1-2): 95-9.
- 642 13. Ikeda K, Hirayama T, Takazawa T, Kawabe K, Iwasaki Y. Relationships between disease progression  
643 and serum levels of lipid, urate, creatinine and ferritin in Japanese patients with amyotrophic  
644 lateral sclerosis: a cross-sectional study. *Intern Med* 2012; **51**(12): 1501-8.
- 645 14. Paganoni S, Zhang M, Quiroz Zarate A, et al. Uric acid levels predict survival in men with  
646 amyotrophic lateral sclerosis. *Journal of neurology* 2012; **259**(9): 1923-8.
- 647 15. Zheng Z, Guo X, Wei Q, et al. Serum uric acid level is associated with the prevalence but not with  
648 survival of amyotrophic lateral sclerosis in a Chinese population. *Metab Brain Dis* 2014; **29**(3): 771-  
649 5.
- 650 16. Chio A, Calvo A, Bovio G, et al. Amyotrophic lateral sclerosis outcome measures and the role of  
651 albumin and creatinine: a population-based study. *JAMA neurology* 2014; **71**(9): 1134-42.
- 652 17. Mandrioli J, Rosi E, Fini N, et al. Changes in routine laboratory tests and survival in amyotrophic  
653 lateral sclerosis. *Neurol Sci* 2017; **38**(12): 2177-82.
- 654 18. O'Reilly EJ, Liu D, Johns DR, et al. Serum urate at trial entry and ALS progression in EMPOWER.  
655 *Amyotroph Lateral Scler Frontotemporal Degener* 2017; **18**(1-2): 120-5.
- 656 19. Paganoni S, Nicholson K, Chan J, et al. Urate levels predict survival in amyotrophic lateral sclerosis:  
657 Analysis of the expanded Pooled Resource Open-Access ALS clinical trials database. *Muscle &*  
658 *nerve* 2018; **57**(3): 430-4.

- 659 20. Kuffner R, Zach N, Norel R, et al. Crowdsourced analysis of clinical trial data to predict amyotrophic  
660 lateral sclerosis progression. *Nature biotechnology* 2015; **33**(1): 51-7.
- 661 21. Paillisse C, Lacomblez L, Dib M, Bensimon G, Garcia-Acosta S, Meininger V. Prognostic factors for  
662 survival in amyotrophic lateral sclerosis patients treated with riluzole. *Amyotroph Lateral Scler*  
663 *Other Motor Neuron Disord* 2005; **6**(1): 37-44.
- 664 22. Lunetta C, Lizio A, Maestri E, et al. Serum C-Reactive Protein as a Prognostic Biomarker in  
665 Amyotrophic Lateral Sclerosis. *JAMA neurology* 2017; **74**(6): 660-7.
- 666 23. Nagel G, Peter RS, Rosenbohm A, et al. Adipokines, C-reactive protein and Amyotrophic Lateral  
667 Sclerosis - results from a population- based ALS registry in Germany. *Sci Rep* 2017; **7**(1): 4374.
- 668 24. Cedarbaum JM, Stambler N, Malta E, et al. The ALSFRS-R: a revised ALS functional rating scale that  
669 incorporates assessments of respiratory function. BDNF ALS Study Group (Phase III). *Journal of the*  
670 *neurological sciences* 1999; **169**(1-2): 13-21.
- 671 25. Kimura F, Fujimura C, Ishida S, et al. Progression rate of ALSFRS-R at time of diagnosis predicts  
672 survival time in ALS. *Neurology* 2006; **66**(2): 265-7.
- 673 26. McMillan CT, Wu J, Rascovsky K, et al. Defining cognitive impairment in amyotrophic lateral  
674 sclerosis: an evaluation of empirical approaches. *Amyotroph Lateral Scler Frontotemporal Degener*  
675 2022; **23**(7-8): 517-26.
- 676 27. Rogers ML, Atmosukarto I, Berhanu DA, Matusica D, Macardle P, Rush RA. Functional monoclonal  
677 antibodies to p75 neurotrophin receptor raised in knockout mice. *Journal of neuroscience methods*  
678 2006; **158**(1): 109-20.
- 679 28. Thompson SJ, Schatteman GC, Gown AM, Bothwell M. A monoclonal antibody against nerve  
680 growth factor receptor. Immunohistochemical analysis of normal and neoplastic human tissue. *Am*  
681 *J Clin Pathol* 1989; **92**(4): 415-23.
- 682 29. Shephard SR, Karnaros V, Benyamin B, et al. Urinary neopterin: A novel biomarker of disease  
683 progression in amyotrophic lateral sclerosis. *Eur J Neurol* 2022; **29**(4): 990-9.
- 684 30. Mikheev MI, Lowry LK. WHO global project on biological monitoring of chemical exposure at the  
685 workplace. *Int Arch Occup Environ Health* 1996; **68**(6): 387-8.
- 686 31. DeJesus-Hernandez M, Mackenzie IR, Boeve BF, et al. Expanded GGGGCC Hexanucleotide Repeat in  
687 Noncoding Region of C9ORF72 Causes Chromosome 9p-Linked FTD and ALS. *Neuron* 2011.
- 688 32. Strong MJ, Abrahams S, Goldstein LH, et al. Amyotrophic lateral sclerosis - frontotemporal  
689 spectrum disorder (ALS-FTSD): Revised diagnostic criteria. *Amyotroph Lateral Scler Frontotemporal*  
690 *Degener* 2017; **18**(3-4): 153-74.
- 691 33. McHutchison CA, Wu J, McMillan CT, et al. Temporal course of cognitive and behavioural changes  
692 in motor neuron diseases. *J Neurol Neurosurg Psychiatry* 2023.
- 693 34. Greenland S. Dose-response and trend analysis in epidemiology: alternatives to categorical  
694 analysis. *Epidemiology* 1995; **6**(4): 356-65.
- 695 35. Halbgebauer S, Steinacker P, Verde F, et al. Comparison of CSF and serum neurofilament light and  
696 heavy chain as differential diagnostic biomarkers for ALS. *J Neurol Neurosurg Psychiatry* 2022;  
697 **93**(1): 68-74.
- 698 36. Sturmey E, Malaspina A. Blood biomarkers in ALS: challenges, applications and novel frontiers.  
699 *Acta Neurol Scand* 2022; **146**(4): 375-88.
- 700 37. Rogers ML, Schultz DW, Karnaros V, Shephard SR. Urinary biomarkers for amyotrophic lateral  
701 sclerosis: candidates, opportunities and considerations. *Brain Commun* 2023; **5**(6): fcad287.
- 702 38. Cudkovicz ME, Titus S, Kearney M, et al. Safety and efficacy of ceftriaxone for amyotrophic lateral  
703 sclerosis: a multi-stage, randomised, double-blind, placebo-controlled trial. *Lancet Neurol* 2014;  
704 **13**(11): 1083-91.

- 705 39. Vucic S, Menon P, Huynh W, et al. Efficacy and safety of CNM-Au8 in amyotrophic lateral sclerosis  
706 (RESCUE-ALS study): a phase 2, randomised, double-blind, placebo-controlled trial and open label  
707 extension. *EClinicalMedicine* 2023; **60**: 102036.
- 708 40. Schoenfeld DA, Finkelstein DM, Macklin E, et al. Design and analysis of a clinical trial using previous  
709 trials as historical control. *Clin Trials* 2019; **16**(5): 531-8.
- 710 41. van Eijk RPA, de Jongh AD, Nikolakopoulos S, et al. An old friend who has overstayed their  
711 welcome: the ALSFRS-R total score as primary endpoint for ALS clinical trials. *Amyotroph Lateral*  
712 *Scler Frontotemporal Degener* 2021; **22**(3-4): 300-7.
- 713 42. Fournier CN. Considerations for Amyotrophic Lateral Sclerosis (ALS) Clinical Trial Design.  
714 *Neurotherapeutics* 2022; **19**(4): 1180-92.
- 715 43. Rooney J, Burke T, Vajda A, Heverin M, Hardiman O. What does the ALSFRS-R really measure? A  
716 longitudinal and survival analysis of functional dimension subscores in amyotrophic lateral  
717 sclerosis. *J Neurol Neurosurg Psychiatry* 2017; **88**(5): 381-5.
- 718 44. Gordon PH, Cheng B, Salachas F, et al. Progression in ALS is not linear but is curvilinear. *Journal of*  
719 *neurology* 2010; **257**(10): 1713-7.
- 720 45. Proudfoot M, Jones A, Talbot K, Al-Chalabi A, Turner MR. The ALSFRS as an outcome measure in  
721 therapeutic trials and its relationship to symptom onset. *Amyotroph Lateral Scler Frontotemporal*  
722 *Degener* 2016; **17**(5-6): 414-25.
- 723 46. Genge A, Cedarbaum JM, Shefner J, et al. The ALSFRS-R Summit: a global call to action on the use  
724 of the ALSFRS-R in ALS clinical trials. *Amyotroph Lateral Scler Frontotemporal Degener* 2024; **25**(3-  
725 4): 382-7.
- 726 47. Lu CH, Macdonald-Wallis C, Gray E, et al. Neurofilament light chain: A prognostic biomarker in  
727 amyotrophic lateral sclerosis. *Neurology* 2015; **84**(22): 2247-57.
- 728 48. Steinacker P, Huss A, Mayer B, et al. Diagnostic and prognostic significance of neurofilament light  
729 chain NF-L, but not progranulin and S100B, in the course of amyotrophic lateral sclerosis: Data  
730 from the German MND-net. *Amyotroph Lateral Scler Frontotemporal Degener* 2017; **18**(1-2): 112-  
731 9.
- 732 49. Gille B, De Schaepdryver M, Goossens J, et al. Serum neurofilament light chain levels as a marker  
733 of upper motor neuron degeneration in patients with Amyotrophic Lateral Sclerosis. *Neuropathol*  
734 *Appl Neurobiol* 2019; **45**(3): 291-304.
- 735 50. Verde F, Steinacker P, Weishaupt JH, et al. Neurofilament light chain in serum for the diagnosis of  
736 amyotrophic lateral sclerosis. *J Neurol Neurosurg Psychiatry* 2019; **90**(2): 157-64.
- 737 51. Benatar M, Ostrow LW, Lewcock JW, et al. Biomarker Qualification for Neurofilament Light Chain in  
738 Amyotrophic Lateral Sclerosis: Theory and Practice. *Annals of neurology* 2024; **95**(2): 211-6.
- 739  
740  
741

742 **Figure Legends**

743

744 **Figure 1. ALSFRS-R Slope and its Relationship to Baseline NfL**

745 **(a)** Random slopes model of ALSFRS-R over time, with errors bars showing 95% confidence  
746 intervals (CI). Faint grey dotted line illustrates the linear estimate of change in ALSFRS-R over  
747 time. **(b)** Relationship between baseline serum NfL (measured in duplicate) and future rate of  
748 progression of the ALSFRS-R (Spearman correlation coefficient = -0.57, 95% CI -0.66 to -0.47,  
749  $p < 0.0001$ ) among  $n = 203$  study participants. The straight orange line shows the linear  
750 prediction. The bent blue line represents a partial-linear spline with knots chosen post-hoc at  
751 40 and 100 pg/mL. The smooth green curve is a smoothing spline through the empirical Bayes  
752 slope estimates.

753

754 **Figure 2. Longitudinal Biomarker Trajectories**

755 Longitudinal trajectories of **(a)** serum NfL; **(b)** serum pNfH; and **(c)** urinary  $p75^{ECD}$ . Y-axis  
756 shows percent change in each biomarker compared to baseline, plotted on a log scale. The  
757 faint grey dotted line illustrates the linear estimate of biomarker change over time. Error bars  
758 represent 95% confidence intervals (CI), widened at later time points due to participant attrition  
759 over time and fewer biomarker data available. NfL and pNfH were measured in duplicate;  
760  $p75^{ECD}$  quantified with a median of 3 replicates. Single NfL and pNfH values from the 18-month  
761 visit of a single participant have been excluded (see footnote to Table 2 for detailed  
762 explanation).

763

764 **Figure 3. Kaplan-Meier Survival Curves**

765 Permanent assisted ventilation (PAV)- and tracheostomy-free survival for **(a)** the ENCALS  
766 predictor score, divided into quartiles; **(b)**  $\Delta$ FRS, divided into quartiles; **(c)** baseline serum NfL,  
767 divided into quartiles; and **(d)** baseline plasma miR-181ab dichotomised at the median value of  
768 24,590 UMI. The range of values for each clinical or biological marker within a defined quartile,  
769 as well as the number of observations at each time point, are shown below each KM plot.  
770 Shading represents pointwise log-log confidence intervals.

771

772

773



774 **Tables**

775

776 **Table 1a. Baseline demographic and key clinical features**

777

| Characteristic                                    |                         | Total N=203              |
|---------------------------------------------------|-------------------------|--------------------------|
| Sex                                               | Male                    | 112 (55.2%)              |
|                                                   | Female                  | 91 (44.8%)               |
| Race                                              | White                   | 179 (88.2%)              |
|                                                   | Black                   | 15 (7.4%)                |
|                                                   | Asian                   | 4 (2.0%)                 |
|                                                   | Other                   | 5 (2.5%)                 |
| Ethnicity                                         | Hispanic/Latino         | 36 (17.7%)               |
|                                                   | Non-Hispanic/Latino     | 167 (82.3%)              |
| Gene with a pathogenic variant                    | <i>C9orf72</i>          | 20 (9.9%)                |
|                                                   | <i>SOD1</i>             | 3 (1.5%)                 |
|                                                   | <i>TARDBP</i>           | 1 (0.5%)                 |
|                                                   | [Unknown] <sup>2</sup>  | 179 (88.2%)              |
| Age at onset, years                               | Mean ± SD (Range)       | 57.1 ± 12.0 (15-82)      |
| Bulbar symptoms at onset                          | No                      | 147 (72.4%)              |
|                                                   | Yes                     | 56 (27.6%)               |
| Diagnostic delay, months                          | Median (Q1-Q3)          | 8.2 (5.2-13.8)           |
| Time from symptom onset to baseline, months       | Median (Q1-Q3)          | 14.4 (10.5-22.5)         |
| Baseline ΔFRS, points/month                       | Median (Q1-Q3)          | 0.60 (0.4-0.9)           |
| Baseline age, years                               | Mean ± SD (Range)       | 58.5 ± 12.1 (17-83)      |
| Baseline EI Escorial category                     | Clinically definite ALS | 45 (22.2%)               |
|                                                   | Clinically probable ALS | 95 (46.8%)               |
|                                                   | Other                   | 63 (31.0%)               |
| Baseline ALSFRS-R total score                     | Mean ± SD (Range)       | 37.9 ± 5.7 (15-48)       |
| Baseline SVC, %predicted                          | Mean ± SD (Range)       | 85.3 ± 17.2 (52.0-135.5) |
| Baseline ECAS total score <sup>1</sup>            | Mean ± SD (Range)       | 110.2 ± 12.4 (44-130)    |
| Baseline ECAS ALS-specific score <sup>1</sup>     | Mean ± SD (Range)       | 81.8 ± 10.3 (35-97)      |
| Baseline ECAS ALS non-specific score <sup>1</sup> | Mean ± SD (Range)       | 28.4 ± 3.7 (9-35)        |
| Baseline cognitive impairment, by ECAS            | No                      | 137 (87.8%)              |
|                                                   | Yes                     | 19 (12.2%)               |
|                                                   | [n/a] <sup>3</sup>      | 47 (--)                  |
| Baseline behavioural impairment, by ECAS          | No                      | 95 (84.8%)               |
|                                                   | Yes                     | 17 (15.2%)               |
|                                                   | [n/a] <sup>4</sup>      | 91 (--)                  |
| Survival duration from baseline, months           | Median (Q1-Q3)          | 30.1 (17.4-47.7)         |
| PAV, tracheostomy, or death occurrence            | No                      | 110 (54.2%)              |
|                                                   | Yes                     | 93 (45.8%)               |
| Number of sample collections                      | 2                       | 48 (23.6%)               |
|                                                   | 3                       | 56 (27.6%)               |
|                                                   | 4                       | 47 (23.2%)               |
|                                                   | 5                       | 52 (25.6%)               |

778 <sup>1</sup> Among English speakers (n=171)

779 <sup>2</sup> No pathogenic variant identified (by *C9orf72* testing and whole genome sequencing) in known disease-causing genes.

780 <sup>3</sup> Not available, because a non-English version of ECAS was completed or if there was insufficient information to determine impairment status.

781 <sup>4</sup> Not available, because a non-English version of ECAS was completed, caregiver did not complete ECAS, or if there was insufficient information to determine impairment status.

782

783

784

785

786 SD = Standard deviation. Q1 = 1<sup>st</sup> quartile. Q3 = 3<sup>rd</sup> quartile.  
787 ECAS = Edinburgh Cognitive and Behavioural ALS Screen.  
788 SVC = Slow vital capacity. PAV = Permanent assisted ventilation.  
789  
790  
791

792 **Table 1b. Baseline biomarker data**  
793

| Biomarker                                     | N                | Mean $\pm$ SD       | Median (Q1, Q3)         | Range           |
|-----------------------------------------------|------------------|---------------------|-------------------------|-----------------|
| Serum NfL (pg/mL)                             | 203              | 73.9 $\pm$ 47.0     | 67.9 (37.9, 92.5)       | 9.1 – 214       |
| Serum pNfH (pg/mL)                            | 203              | 598 $\pm$ 718       | 267 (110, 924)          | 3.4 – 4,177     |
| Serum NfL/pNfH ratio                          | 203              | 0.52 $\pm$ 1.56     | 0.18 (0.09, 0.50)       | 0.020 – 20.9    |
| Urinary p75 <sup>ECD</sup> (ng/mg creatinine) | 160 <sup>1</sup> | 5.54 $\pm$ 2.42     | 5.05 (3.93, 6.44)       | 1.53 – 16.1     |
| Serum uric acid (mg/dL)                       | 203              | 5.19 $\pm$ 1.31     | 5.00 (4.20, 6.20)       | 2.60 – 8.90     |
| Serum creatinine (mg/dL)                      | 203              | 0.78 $\pm$ 0.20     | 0.77 (0.66, 0.90)       | 0.29 – 1.59     |
| Serum albumin (g/dL)                          | 203              | 4.55 $\pm$ 0.34     | 4.50 (4.30, 4.80)       | 3.60 – 5.80     |
| Serum CRP (mg/dL)                             | 203              | 0.27 $\pm$ 0.35     | 0.10 (0.10, 0.50)       | 0.10 – 2.30     |
| Plasma miR-181a (UMI)                         | 201              | 451 $\pm$ 208       | 418 (312, 552)          | 124 – 1,699     |
| Plasma miR-181b (UMI)                         | 201              | 66.2 $\pm$ 31.4     | 61.2 (44.8, 79.7)       | 13.8 – 263      |
| Plasma miR-181ab (UMI <sup>2</sup> )          | 201              | 34,663 $\pm$ 39,372 | 24,590 (13,638, 42,836) | 3,148 – 447,480 |

794 UMI = unique molecular identifier

795  
796 <sup>1</sup> Urinary p75<sup>ECD</sup> only available from a subset of study participants.

797  
798  
799  
800  
801  
802  
803  
804  
805  
806

**Table 2. Longitudinal biomarker trajectories**

| Biomarker                                     | Increase per month, relative to baseline |                 |         |
|-----------------------------------------------|------------------------------------------|-----------------|---------|
|                                               | Mean                                     | (95% CI)        | P-value |
| Serum NfL (pg/mL) <sup>1</sup>                | 0.98%                                    | (0.57%, 1.38%)  | <0.0001 |
| Serum pNfH (pg/mL) <sup>1</sup>               | 0.45%                                    | (-0.12%, 1.03%) | 0.12    |
| Serum NfL/pNfH ratio                          | 0.44%                                    | (-0.09%, 0.97%) | 0.10    |
| Urinary p75 <sup>ECD</sup> (ng/mg creatinine) | 2.59%                                    | (2.01%, 3.17%)  | <0.0001 |

807 Values are unadjusted for core clinical covariates

808  
809 <sup>1</sup> One substantial outlier, from the 18-month visit (i.e. visit 5) of a participant, was excluded.

810

**Table 3. Prognostic markers of survival**

| Prognostic Marker<br>(in quartiles or binary) | Unadjusted Analysis*                                                              |            |            |             |                       | Adjusted Analysis*                                            |                       |                                                            |                       |
|-----------------------------------------------|-----------------------------------------------------------------------------------|------------|------------|-------------|-----------------------|---------------------------------------------------------------|-----------------------|------------------------------------------------------------|-----------------------|
|                                               | Estimated median survival (95% CI) in months <sup>1</sup> ,<br>by marker quartile |            |            |             |                       | Covariates included:<br>Core clinical predictors <sup>2</sup> |                       | Covariate included:<br>ENCALS predictor score <sup>3</sup> |                       |
|                                               | Q1 / No                                                                           | Q2         | Q3         | Q4 /<br>Yes | p-value               | HR (95% CI)<br>[Q4 vs Q1] <sup>4</sup>                        | p-value               | HR (95% CI)<br>[Q4 vs Q1] <sup>5</sup>                     | p-value               |
| Sex, male                                     | 25 (22-37)                                                                        | --         | --         | 31 (26-46)  | 0.62                  | 1.13 (0.7-1.8)                                                | 0.61                  | 0.98 (0.6-1.5)                                             | 0.91                  |
| Age at onset, years                           | 47 (31-48)                                                                        | 25 (21-37) | 24 (17-37) | 22 (16-34)  | 0.023                 | 1.33 (0.3-6.2)                                                | 0.28                  | 1.34 (0.7-2.6)                                             | 0.59                  |
| Bulbar symptoms at onset                      | 33 (30-46)                                                                        | --         | --         | 22 (17-27)  | 0.039                 | N/A                                                           |                       | 1.31 (0.8-2.0)                                             | 0.25                  |
| Diagnostic delay                              | 30 (22-37)                                                                        | 27 (20-48) | 27 (22-ne) | 56 (21-ne)  | 0.096                 | 0.65 (0.1 - 3.1)                                              | 0.73                  | 1.66 (0.7-3.7)                                             | 0.43                  |
| Baseline ΔFRS                                 | 47 (34-ne)                                                                        | 35 (22-56) | 30 (22-43) | 17 (14-27)  | <0.0001 <sup>13</sup> | 3.64 (1.3-10.5)                                               | 0.11                  | 1.62 (0.7-3.7)                                             | 0.39                  |
| Baseline age                                  | 46 (30-48)                                                                        | 23 (19-37) | 25 (19-43) | 30 (17-34)  | 0.073                 | 0.46 (0.1-2.2)                                                | 0.10                  | 1.21 (0.6-2.3)                                             | 0.23                  |
| Baseline ALSFRS-R                             | 22 (16-26)                                                                        | 24 (21-32) | 48 (31-ne) | 43 (31-48)  | 0.0010 <sup>13</sup>  | 0.55 (0.3-1.1)                                                | 0.03                  | 0.61 (0.3-1.1)                                             | 0.04                  |
| Baseline SVC %predicted                       | 20 (15-27)                                                                        | 31 (23-47) | 34 (24-ne) | 47 (27-ne)  | 0.0046                | 0.49 (0.3-0.9)                                                | 0.10                  | 0.64 (0.3-1.2)                                             | 0.58                  |
| Baseline ECAS total <sup>6</sup>              | 31 (15-56)                                                                        | 30 (22-47) | 31 (19-48) | 48 (24-ne)  | 0.54                  | 0.99 (0.5-2.1)                                                | 0.78                  | 0.77 (0.4-1.6)                                             | 0.75                  |
| Baseline ECAS ALS-specific <sup>6</sup>       | 37 (18-ne)                                                                        | 30 (20-47) | 23 (17-49) | 48 (26-ne)  | 0.14                  | 1.12 (0.5-2.6)                                                | 0.12                  | 0.88 (0.4-2.0)                                             | 0.17                  |
| Baseline ECAS ALS non-specific <sup>6</sup>   | 25 (14-37)                                                                        | 47 (26-48) | 30 (19-ne) | 31 (23-48)  | 0.37                  | 0.68 (0.3-1.4)                                                | 0.73                  | 0.65 (0.3-1.3)                                             | 0.66                  |
| Baseline cognitive impairment <sup>6</sup>    | 30 (25-46)                                                                        | --         | --         | 37 (13-ne)  | 0.99                  | 0.70 (0.3-1.5)                                                | 0.41                  | 0.84 (0.3-1.7)                                             | 0.67                  |
| Baseline behavioural impairment <sup>6</sup>  | 34 (25-47)                                                                        | --         | --         | 18 (8-ne)   | 0.48                  | 1.06 (0.4-2.4)                                                | 0.90                  | 1.67 (0.7-3.6)                                             | 0.22                  |
| Baseline ENCALS predictor score               | 48 (39-ne)                                                                        | 35 (26-ne) | 24 (20-32) | 17 (13-25)  | <0.0001 <sup>13</sup> | 4.55 (1.5 -14.7)                                              | 0.054                 | 1.61 (0.3-7.4)                                             | 0.87                  |
| Baseline serum NfL                            | 49 (46-ne)                                                                        | 30 (23-35) | 26 (17-39) | 17 (13-22)  | <0.0001 <sup>13</sup> | 7.71 (3.7 -17.1)                                              | <0.0001 <sup>13</sup> | 7.34 (3.7-15.8)                                            | <0.0001 <sup>13</sup> |
| Baseline serum pNfH                           | 43 (30-ne)                                                                        | 23 (17-37) | 25 (23-46) | 26 (19-47)  | 0.18                  | 1.74 (1.0-3.2)                                                | 0.28                  | 1.68 (1.0-3.0)                                             | 0.36                  |
| Baseline urinary p75 <sup>ECD</sup>           | 34 (24-46)                                                                        | 31 (21-ne) | 22 (14-ne) | 30 (19-48)  | 0.77                  | 0.92 (0.4-1.9)                                                | 0.94                  | 0.65 (0.3-1.3)                                             | 0.57                  |
| Baseline serum uric acid                      | 25 (21-37)                                                                        | 31 (15-46) | 30 (23-34) | 47 (25-56)  | 0.25                  | 0.69 (0.4-1.3)                                                | 0.38                  | 0.58 (0.3-1.1)                                             | 0.22                  |
| Baseline serum creatinine                     | 31 (21-46)                                                                        | 24 (19-48) | 31 (22-ne) | 30 (23-47)  | 0.99                  | 0.87 (0.5-1.6)                                                | 0.89                  | 0.95 (0.5-1.7)                                             | 0.97                  |
| Baseline serum albumin                        | 25 (20-35)                                                                        | 23 (19-52) | 32 (22-47) | 34 (27-47)  | 0.72                  | 0.95 (0.5-1.8)                                                | 0.99                  | 0.96 (0.5-1.8)                                             | 0.96                  |
| Baseline serum CRP                            | 30 (24-39)                                                                        |            | 26 (9-ne)  | 30 (22-47)  | 0.85                  | 1.07 (0.6-1.8)                                                | 0.96                  | 1.08 (0.6-1.7)                                             | 0.95                  |
| Baseline plasma miR-181ab                     | 35 (30-ne)                                                                        | 34 (24-52) | 26 (20-47) | 22 (17-30)  | 0.021                 | 1.90 (1.0-3.6)                                                | 0.16                  | 1.82 (1.0-3.3)                                             | 0.096                 |
| Baseline miR-181ab > 39,300 UMI <sup>7</sup>  | 33 (26-48)                                                                        | --         | --         | 23 (17-32)  | 0.0062                | 1.55 (0.9-2.5)                                                | 0.075                 | 1.55 (1.0-2.4)                                             | 0.050                 |
| Baseline miR-181ab > 24,590 UMI <sup>8</sup>  | 35 (30-48)                                                                        | --         | --         | 23 (20-32)  | 0.016                 | 1.65 (1.1-2.6)                                                | 0.030                 | 1.73 (1.1-2.7)                                             | 0.014                 |
| Baseline NfL+miR181ab poor Px <sup>9</sup>    | 37 (30-48)                                                                        | --         | --         | 17 (15-21)  | <0.0001 <sup>13</sup> | 2.69 (1.6-4.4)                                                | 0.0001 <sup>13</sup>  | 2.61 (1.7-4.1)                                             | <0.0001 <sup>13</sup> |
| Baseline NfL+miR181ab poor Px <sup>10</sup>   | 47 (34-48)                                                                        | --         | --         | 20 (16-22)  | <0.0001 <sup>13</sup> | 3.14 (2.0-5.1)                                                | <0.0001 <sup>13</sup> | 3.19 (2.0-5.0)                                             | <0.0001 <sup>13</sup> |
| Baseline NfL median split <sup>11</sup>       | 47 (31-48)                                                                        | --         | --         | 20 (16-25)  | <0.0001 <sup>13</sup> | 2.24 (1.4-3.6)                                                | 0.0006 <sup>13</sup>  | 2.29 (1.5-3.6)                                             | 0.0002 <sup>13</sup>  |
| Baseline NfL 4-level split <sup>12</sup>      | 47 (46-52)                                                                        | 24 (19-31) | 32 (14-18) | 17 (15-22)  | <0.0001 <sup>13</sup> | 4.28 (2.4-8.0)                                                | 0.0001 <sup>13</sup>  | 4.12 (2.3-7.5)                                             | 0.0001 <sup>13</sup>  |

\*Survival analysis. Q1-Q4 indicate quartiles of continuous predictors, with higher quartiles representing higher values. Yes/No in column headings captures the presence/absence of binary predictors. ne = not estimable.

<sup>1</sup> Without inclusion of covariate or prognostic marker in the model, median survival (95% CI) = 30 (17-48) months.

<sup>2</sup> Core clinical predictors in survival analyses include bulbar onset, diagnostic delay,  $\Delta$ FRS, and baseline age.

<sup>3</sup> ENCALS predictor score is derived from  $\Delta$ FRS, bulbar onset, diagnostic delay, age at onset, SVC percent predicted, El Escorial definite ALS, presence of FTD, and presence of a *C9orf72* repeat expansion.

<sup>4</sup> These HRs compare Q4 to Q1 of each prognostic marker in a model that also adjusts for the core clinical predictors of survival. While the adjusted analyses include diagnostic delay,  $\Delta$ FRS, and baseline age as linear covariates, the potential additional prognostic value of each of these predictors (see respective rows) is evaluated by contrasting top and bottom quartiles to detect possible non-linear effects.

<sup>5</sup> These HRs compare Q4 to Q1 of each prognostic marker in a model that also adjusts for the ENCALS score as a linear covariate. The potential additional prognostic value of the ENCALS predictor score (see row) is evaluated by contrasting top and bottom quartiles to detect possible non-linear effects.

<sup>6</sup> Among English speakers (n=171)

<sup>7</sup> Threshold of 39,300 UMI in plasma as defined by Magen et al <sup>11</sup>

<sup>8</sup> Median of 24,590 UMI in plasma in the current dataset

<sup>9</sup> Poor prognosis based on published optimal combination of NfL and miR-181ab, in which a poor prognostic factor is defined as either (NfL > 109.8pg/ml) or (NfL > 59.0pg/ml and miR-181ab > 39,300 UMI) <sup>11</sup>.

<sup>10</sup> Poor prognosis based on recalculated combination of NfL and miR-181ab using thresholds obtained from the current dataset; a poor prognostic factor is defined as either (NfL > 80.8 pg/mL) or (NfL > 44.8 pg/mL and miR-181ab > 24,590 UMI).

<sup>11</sup> Median serum NfL = 67.9 pg/mL

<sup>12</sup> Serum NfL 4-level split is at the 33<sup>rd</sup>, 50<sup>th</sup>, and 67<sup>th</sup> percentiles (44.8 pg/mL, 67.9 pg/mL, and 80.8 pg/mL, respectively), i.e., tertiles and median, rather than quartiles, to mimic construction of the NfL+miR18ab measure <sup>11</sup>.

<sup>13</sup> p-value remains statistically significant after adjustment for multiplicity. Holm-Bonferroni adjusted p-values are reported in eTable 7.

**Table 4. Prognostic markers of functional decline**

| Prognostic Marker<br>(in quartiles or binary) | Unadjusted Analysis *                                     |                     |                     |                     |                       | Adjusted Analysis *                                       |                      |                      |                      |                       |
|-----------------------------------------------|-----------------------------------------------------------|---------------------|---------------------|---------------------|-----------------------|-----------------------------------------------------------|----------------------|----------------------|----------------------|-----------------------|
|                                               | ALSFRS-R slope (points/month): Estimate (SE) <sup>1</sup> |                     |                     |                     | p-value               | ALSFRS-R slope (points/month): Estimate (SE) <sup>1</sup> |                      |                      |                      | p-value               |
|                                               | Q1 /No                                                    | Q2                  | Q3                  | Q4 / Yes            |                       | Q1 /No                                                    | Q2                   | Q3                   | Q4 / Yes             |                       |
| Sex, male                                     | -0.90 (-1.1, -0.74)                                       | --                  | --                  | -0.88 (-1.0, -0.73) | 0.80                  | -0.90 (-1.1, -0.75)                                       | --                   | --                   | -0.88 (-1.0, -0.74)  | 0.83                  |
| Age at onset                                  | -0.74 (-.95, -0.53)                                       | -0.90 (-1.1, -0.70) | -1.00 (-1.2, -0.79) | -0.91 (-1.1, -0.67) | 0.38                  | -0.87 (-1.1, -0.66)                                       | -0.91 (-1.10, -0.72) | -0.95 (-1.1, -0.75)  | -0.79 (-1.0, -0.56)  | 0.77                  |
| Bulbar symptoms at onset                      | -0.82 (-.94, -0.70)                                       | --                  | --                  | -1.07 (-1.3, -0.87) | 0.036                 | -0.84 (-0.96, -0.72)                                      | --                   | --                   | -1.02 (-1.2, -0.82)  | 0.14                  |
| Diagnostic delay                              | -1.10 (-1.3, -.090)                                       | -0.99 (-1.2, -0.79) | -0.70 (-.92, -0.48) | -0.73 (-.93, -0.52) | 0.016                 | -0.99 (-1.2, -0.78)                                       | -0.93 (-1.10, -0.73) | -0.73 (-0.94, -0.51) | -0.89 (-1.1, -0.66)  | 0.38                  |
| Baseline ΔFRS                                 | -0.72 (-0.91, -0.54)                                      | -0.83 (-1.0, -0.62) | -0.69 (-.89, -0.48) | -1.37 (-1.6, -1.1)  | <0.0001 <sup>10</sup> | -0.87 (-1.1, -0.66)                                       | -0.83 (-1.00, -0.62) | -0.66 (-0.86, -0.45) | -1.22 (-1.5, -0.98)  | 0.0036                |
| Baseline age                                  | -0.76 (-0.97, -0.55)                                      | -0.99 (-1.2, -0.79) | -0.91 (-1.1, -0.69) | -0.89 (-1.1, -0.66) | 0.47                  | -0.88 (-1.1, -0.68)                                       | -0.99 (-1.20, -0.79) | -0.87 (-1.1, -0.66)  | -0.80 (-1.0, -0.58)  | 0.63                  |
| Baseline ALSFRS-R                             | -0.96 (-1.2, -0.75)                                       | -0.92 (-1.1, -0.70) | -0.68 (-.92, -0.45) | -0.93 (-1.1, -0.73) | 0.31                  | -0.88 (-1.1, -0.67)                                       | -0.93 (-1.10, -0.72) | -0.70 (-0.92, -0.47) | -1.00 (-1.2, -0.80)  | 0.24                  |
| Baseline SVC %predicted                       | -1.08 (-1.3, -0.86)                                       | -0.90 (-1.1, -0.70) | -0.85 (-1.1, -0.64) | -0.70 (-.92, -0.48) | 0.12                  | -0.96 (-1.2, -0.74)                                       | -0.92 (-1.10, -0.72) | -0.91 (-1.1, -0.71)  | -0.73 (-0.94, -0.52) | 0.44                  |
| Baseline ECAS total <sup>2</sup>              | -0.99 (-1.2, -0.76)                                       | -0.77 (-1.0, -0.53) | -0.79 (-1.0, -0.55) | -0.84 (-1.1, -0.60) | 0.54                  | -0.98 (-1.2, -0.76)                                       | -0.72 (-0.95, -0.49) | -0.80 (-1.0, -0.57)  | -0.92 (-1.1, -0.68)  | 0.38                  |
| Baseline ECAS ALS-specific <sup>2</sup>       | -0.83 (-1.1, -0.60)                                       | -0.84 (-1.1, -0.62) | -0.92 (-1.2, -0.68) | -0.81 (-1.1, -0.55) | 0.92                  | -0.84 (-1.1, -0.61)                                       | -0.81 (-1.00, -0.59) | -0.93 (-1.2, -0.70)  | -0.85 (-1.1, -0.60)  | 0.89                  |
| Baseline ECAS ALS non-specific <sup>2</sup>   | -0.91 (-1.1, -0.67)                                       | -0.70 (-.92, -0.48) | -0.98 (-1.2, -0.75) | -0.80 (-1.1, -0.54) | 0.36                  | -0.87 (-1.1, -0.65)                                       | -0.73 (-0.95, -0.52) | -0.99 (-1.2, -0.77)  | -0.82 (-1.1, -0.56)  | 0.42                  |
| Baseline cognitive impairment <sup>2</sup>    | -0.83 (-0.96, -0.70)                                      | --                  | --                  | -0.89 (-1.2, -0.54) | 0.73                  | -0.83 (-0.95, -0.70)                                      | --                   | --                   | -0.89 (-1.2, -0.54)  | 0.75                  |
| Baseline behavioural impairment <sup>2</sup>  | -0.78 (-0.93, -0.63)                                      | --                  | --                  | -1.04 (-1.4, -0.66) | 0.21                  | -0.76 (-0.90, -0.61)                                      | --                   | --                   | -0.97 (-1.3, -0.61)  | 0.29                  |
| Baseline ENCALs predictor score               | -0.57 (-0.76, -0.37)                                      | -0.70 (-.89, -0.51) | -1.02 (-1.2, -0.81) | -1.27 (-1.5, -1.1)  | <0.0001 <sup>10</sup> | -0.62 (-0.90, -0.34)                                      | -0.71 (-0.90, -0.51) | -1.00 (-1.2, -0.79)  | -1.23 (-1.5, -0.96)  | 0.021                 |
| Baseline serum NFL                            | -0.41 (-0.58, -0.24)                                      | -0.67 (-.84, -0.50) | -1.10 (-1.3, -0.92) | -1.49 (-1.7, -1.3)  | <0.0001 <sup>10</sup> | -0.44 (-0.60, -0.27)                                      | -0.71 (-0.88, -0.54) | -1.08 (-1.3, -0.90)  | -1.44 (-1.6, -1.2)   | <0.0001 <sup>10</sup> |
| Baseline serum pNFH                           | -0.68 (-0.88, -0.48)                                      | -0.96 (-1.2, -0.74) | -0.82 (-1.0, -0.61) | -1.13 (-1.4, -0.91) | 0.024                 | -0.70 (-0.89, -0.51)                                      | -0.91 (-1.10, -0.71) | -0.86 (-1.1, -0.65)  | -1.12 (-1.3, -0.91)  | 0.041                 |
| Baseline urinary p75 <sup>ECD</sup>           | -0.93 (-1.2, -0.70)                                       | -0.75 (-1.0, -0.50) | -1.03 (-1.3, -0.79) | -0.97 (-1.2, -0.73) | 0.44                  | -0.99 (-1.2, -0.77)                                       | -0.76 (-1.00, -0.52) | -0.96 (-1.2, -0.73)  | -0.96 (-1.2, -0.73)  | 0.50                  |
| Baseline serum uric acid                      | -0.96 (-1.2, -0.75)                                       | -0.85 (-1.1, -0.63) | -0.91 (-1.1, -0.70) | -0.82 (-1.0, -0.60) | 0.82                  | -0.98 (-1.2, -0.78)                                       | -0.82 (-1.00, -0.61) | -0.93 (-1.1, -0.73)  | -0.81 (-1.0, -0.60)  | 0.61                  |
| Baseline serum creatinine                     | -0.90 (-1.1, -0.69)                                       | -0.89 (-1.1, -0.67) | -0.80 (-1.0, -0.57) | -0.95 (-1.2, -0.74) | 0.81                  | -0.91 (-1.1, -0.71)                                       | -0.94 (-1.20, -0.73) | -0.76 (-0.98, -0.54) | -0.93 (-1.1, -0.74)  | 0.61                  |
| Baseline serum albumin                        | -0.82 (-1.0, -0.61)                                       | -0.87 (-1.1, -0.64) | -1.03 (-1.2, -0.85) | -0.71 (-.98, -0.45) | 0.23                  | -0.74 (-0.95, -0.54)                                      | -0.83 (-1.00, -0.62) | -1.09 (-1.3, -0.92)  | -0.76 (-1.0, -0.50)  | 0.039                 |
| Baseline serum CRP <sup>3</sup>               | -0.85 (-0.97, -0.72)                                      |                     | -1.12 (-1.6, -0.66) | -0.97 (-1.2, -0.74) | 0.38                  | -0.84 (-0.96, -0.72)                                      |                      | -1.08 (-1.5, -0.64)  | -0.98 (-1.2, -0.77)  | 0.37                  |
| Baseline plasma miR-181ab                     | -0.71 (-0.92, -0.50)                                      | -0.82 (-1.0, -0.61) | -0.92 (-1.1, -0.70) | -1.11 (-1.3, -0.89) | 0.061                 | -0.71 (-0.91, -0.51)                                      | -0.83 (-1.00, -0.63) | -0.95 (-1.2, -0.74)  | -1.07 (-1.3, -0.86)  | 0.085                 |
| Baseline miR-181ab > 39,300 UMI <sup>4</sup>  | -0.80 (-0.93, -0.68)                                      | --                  | --                  | -1.09 (-1.3, -0.89) | 0.017                 | -0.82 (-0.94, -0.70)                                      | --                   | --                   | -1.06 (-1.3, -0.87)  | 0.037                 |
| Baseline miR-181ab > 24,590 UMI <sup>5</sup>  | -0.76 (-0.91, -0.61)                                      | --                  | --                  | -1.01 (-1.2, -0.86) | 0.023                 | -0.77 (-0.91, -0.63)                                      | --                   | --                   | -1.01 (-1.2, -0.86)  | 0.022                 |
| Baseline NFL+miR181ab poor Px <sup>6</sup>    | -0.69 (-0.80, -0.57)                                      | --                  | --                  | -1.39 (-1.6, -1.2)  | <0.0001 <sup>10</sup> | -0.71 (-0.82, -0.60)                                      | --                   | --                   | -1.34 (-1.5, -1.1)   | <0.0001 <sup>10</sup> |
| Baseline NFL+miR181ab poor Px <sup>7</sup>    | -0.56 (-0.68, -0.43)                                      | --                  | --                  | -1.28 (-1.4, -1.1)  | <0.0001 <sup>10</sup> | -0.59 (-0.72, -0.47)                                      | --                   | --                   | -1.24 (-1.4, -1.1)   | <0.0001 <sup>10</sup> |
| Baseline NFL median split <sup>8</sup>        | -0.54 (-0.66, -0.41)                                      | --                  | --                  | -1.28 (-1.4, -1.1)  | <0.0001 <sup>10</sup> | -0.58 (-0.70, -0.45)                                      | --                   | --                   | -1.24 (-1.4, -1.1)   | <0.0001 <sup>10</sup> |
| Baseline NFL 4-level split <sup>9</sup>       | -0.44 (-0.59, -0.30)                                      | -0.73 (-.94, -0.52) | -1.05 (0.11)        | -1.41 (-1.6, -1.2)  | <0.0001 <sup>10</sup> | -0.48 (-0.63, -0.34)                                      | -0.74 (-0.95, -0.53) | -1.05 (-1.3, -0.83)  | -1.36 (-1.5, -1.2)   | <0.0001 <sup>10</sup> |

\* Random slopes model. ENCALS predictor score included in adjusted analysis. Q1-Q4 indicate quartiles of continuous predictors, with higher quartiles representing higher values. Yes/No in column headings captures the presence/absence of binary predictors.

<sup>1</sup> Without inclusion of covariate or prognostic marker in the model, ALSFRS-R slope (SE) = -0.89 (0.05) points/month.

<sup>2</sup> Among English speakers (n=171)

<sup>3</sup> More than 50% of observations were below the lower limit of quantification and were imputed at 0.1 mg/dL

<sup>4</sup> Threshold of 39,300 UMI in plasma as defined by Magen et al <sup>11</sup>

<sup>5</sup> Median of 24,590 UMI in plasma in the current dataset

<sup>6</sup> Poor prognosis based on published optimal combination of NfL and miR-181ab, in which a poor prognostic factor is defined as either (NfL > 109.8 pg/mL) or (NfL > 59.0 pg/mL and miR-181ab > 39,300 UMI) <sup>11</sup>.

<sup>7</sup> Poor prognosis based on recalculated combination of NfL and miR-181ab using thresholds obtained from the current dataset; a poor prognostic factor is defined as either (NfL > 80.8 pg/mL) or (NfL > 44.8 pg/mL and miR-181ab > 24,590 UMI).

<sup>8</sup> Median serum NfL = 67.9 pg/mL

<sup>9</sup> Serum NfL 4-level split is at the 33<sup>rd</sup>, 50<sup>th</sup>, and 67<sup>th</sup> percentiles (44.8 pg/mL, 67.9 pg/mL, and 80.8 pg/mL, respectively), i.e., tertiles and median, rather than quartiles, to mimic construction of the NfL+miR18ab measure <sup>11</sup>.

<sup>10</sup> p-value remains statistically significant after adjustment for multiplicity. Holm-Bonferroni adjusted p-values are reported in eTable 7.

**Table 5. Estimated total sample size savings in a random slopes model of ALSFRS-R progression that includes the prognostic marker and covariate(s)**

| Prognostic Marker                 | Unadjusted | Covariate(s) included                 |                                     |                                             |                                           |
|-----------------------------------|------------|---------------------------------------|-------------------------------------|---------------------------------------------|-------------------------------------------|
|                                   |            | Core clinical predictors <sup>1</sup> | ENCALS predictor score <sup>2</sup> | Core clinical predictors <sup>1</sup> + NfL | ENCALS predictor score <sup>2</sup> + NfL |
| ENCALS linear score               | -9.0%      | -10.4%                                | --                                  | -33.6%                                      | --                                        |
| Serum NfL                         | -30.9%     | -33.4%                                | -33.6%                              | --                                          | --                                        |
| Serum pNfH                        | -4.0%      | -13.3%                                | -12.3%                              | -33.2%                                      | -33.5%                                    |
| Urinary p75 <sup>ECD</sup>        | -7.6%      | -13.2%                                | -16.4%                              | -37.2%                                      | -37.5%                                    |
| Serum uric acid                   | -0.8%      | -8.2%                                 | -8.2%                               | -33.2%                                      | -33.3%                                    |
| Serum creatinine                  | 1.2%       | -8.3%                                 | -7.8%                               | -33.0%                                      | -33.2%                                    |
| Serum albumin                     | 1.9%       | -8.1%                                 | -7.4%                               | -33.2%                                      | -33.4%                                    |
| Serum CRP                         | -0.3%      | -10.3%                                | -9.3%                               | -33.5%                                      | -33.4%                                    |
| Plasma miR-181ab                  | -2.0%      | -9.7%                                 | -10.6%                              | -34.2%                                      | -35.4%                                    |
| NfL+miR181ab poor Px <sup>3</sup> | -20.7%     | -9.9%                                 | -24.8%                              | -34.5%                                      | -34.1%                                    |
| NfL+miR181ab poor Px <sup>4</sup> | -25.1%     | -9.3%                                 | -28.9%                              | -33.8%                                      | -34.9%                                    |
| NfL median split <sup>5</sup>     | -26.5%     | -29.2%                                | -29.4%                              | -34.2%                                      | -34.4%                                    |
| NfL 4-level split <sup>6</sup>    | -31.4%     | -33.8%                                | -33.4%                              | -34.8%                                      | -34.6%                                    |

Values indicate the combined percent sample size reduction when the prognostic identified by a row heading is added to covariates described in column headings, in a hypothetical clinical trial with ALSFRS-R as the outcome measure, assuming the experimental therapeutic has a 30% treatment effect.

<sup>1</sup> Core clinical predictors of functional decline include bulbar onset, diagnostic delay, and  $\Delta$ FRS.

<sup>2</sup> ENCALs predictor score is derived from  $\Delta$ FRS, bulbar onset, diagnostic delay, age at onset, SVC percent predicted, El Escorial definite ALS, presence of FTD, and presence of a *C9orf72* repeat expansion.

<sup>3</sup> Poor prognosis based on published optimal combination of NfL and miR-181ab, in which a poor prognostic factor is defined as either (NfL > 109.8 pg/mL) or (NfL > 59.0 pg/mL and miR-181ab > 39,300 UMI)<sup>11</sup>.

<sup>4</sup> Poor prognosis based on recalculated combination of NfL and miR-181ab, using thresholds obtained from the current dataset; a poor prognostic factor is defined as either (NfL > 80.8 pg/mL) or (NfL > 44.8 pg/mL and miR-181ab > 24,590 UMI<sup>2</sup>).

<sup>5</sup> Median serum NfL = 67.9 pg/mL

<sup>6</sup> Serum NfL 4-level split is at the 33<sup>rd</sup>, 50<sup>th</sup>, and 67<sup>th</sup> percentiles (44.8 pg/mL, 67.9 pg/mL, and 80.8 pg/mL, respectively), i.e., tertiles and median, rather than quartiles to mimic construction of the NfL+miR18ab measure<sup>11</sup>.



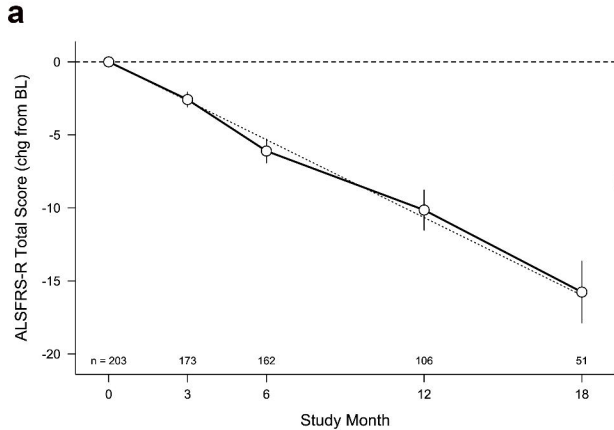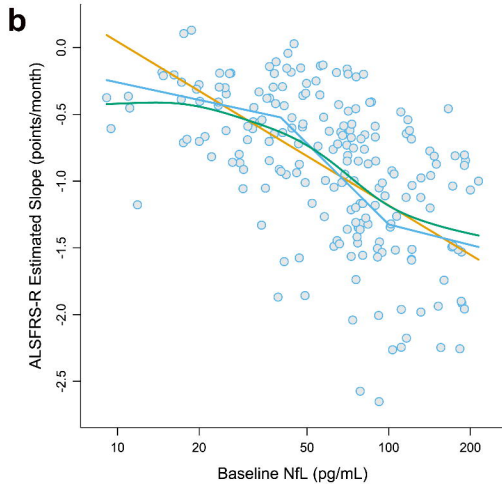

**a**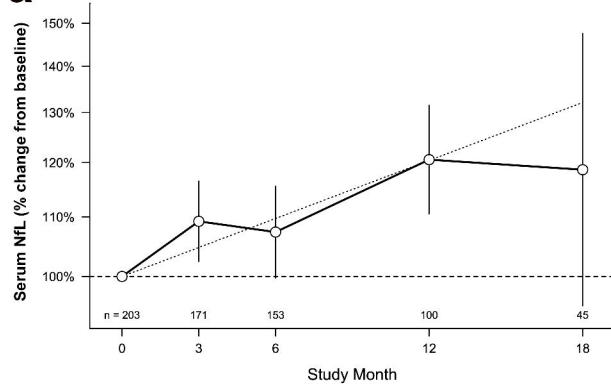**b**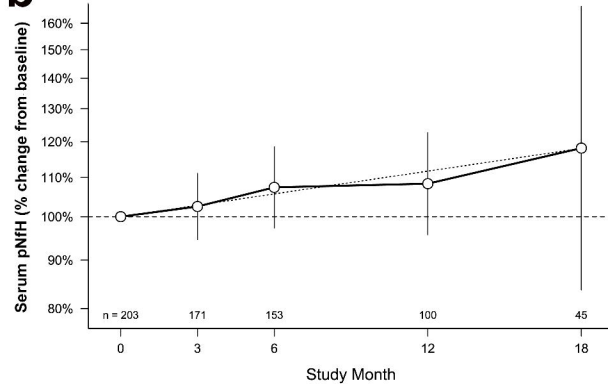**c**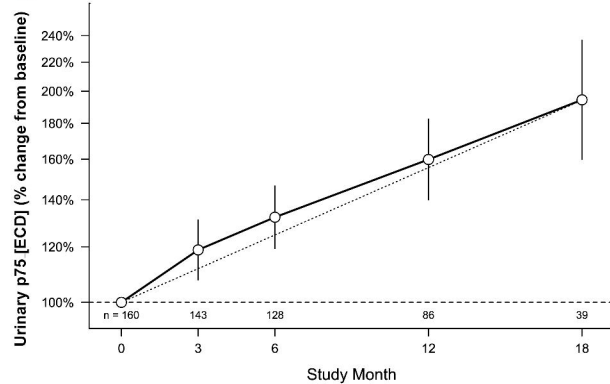

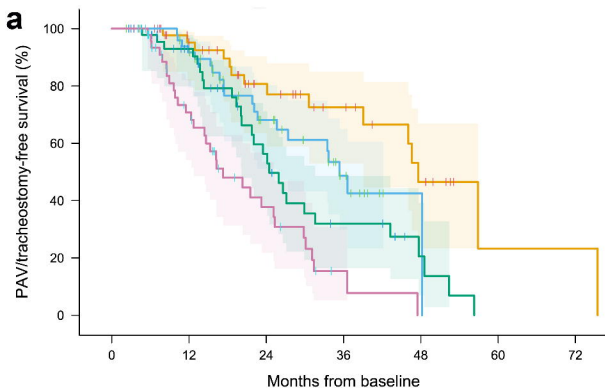

ENCALS linear predictor score

|                |    |    |    |   |   |   |
|----------------|----|----|----|---|---|---|
| 3.5, 7, -3.19) | 36 | 22 | 14 | 7 | 1 | 1 |
| -5.19, -4.23)  | 51 | 43 | 22 | 9 | 1 | 0 |
| -4.23, -3.35)  | 51 | 35 | 17 | 8 | 3 | 0 |
| -3.35, -1.61)  | 50 | 27 | 11 | 2 | 0 | 0 |

Log-rank  $p < 0.001$

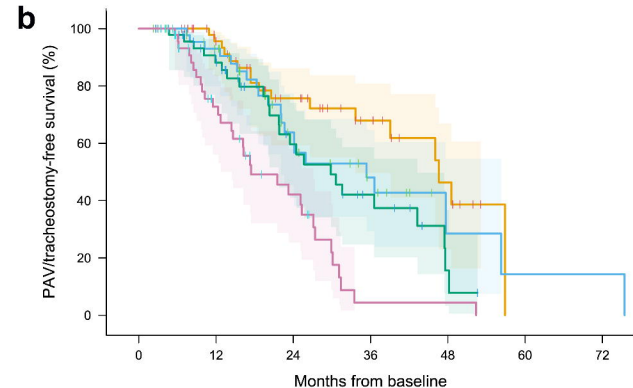

delta-FRS at baseline, points/month

|             |    |    |    |    |   |   |
|-------------|----|----|----|----|---|---|
| 0, 0.35)    | 54 | 42 | 25 | 14 | 6 | 0 |
| 0.35, 0.6)  | 49 | 38 | 18 | 9  | 2 | 1 |
| 0.6, 0.89)  | 50 | 35 | 17 | 9  | 2 | 0 |
| 0.89, 3.05) | 50 | 26 | 12 | 1  | 1 | 0 |

Log-rank  $p < 0.001$

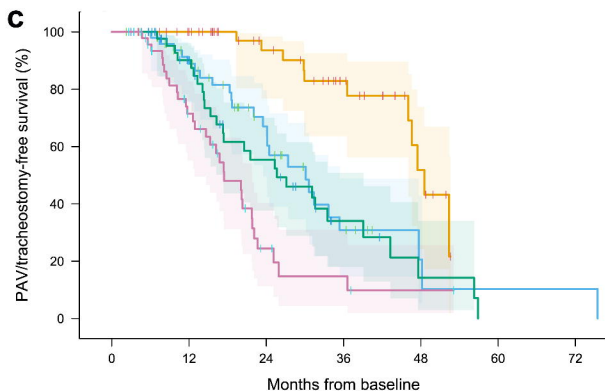

Serum NfL (pg/mL)

|                |    |    |    |    |   |   |
|----------------|----|----|----|----|---|---|
| 9, 124, 37.81) | 51 | 42 | 28 | 17 | 6 | 0 |
| 37.81, 67.86)  | 51 | 38 | 20 | 7  | 2 | 1 |
| 67.86, 92.51)  | 51 | 34 | 18 | 6  | 2 | 0 |
| 92.51, 214.4)  | 50 | 27 | 6  | 3  | 1 | 0 |

Log-rank  $p < 0.001$

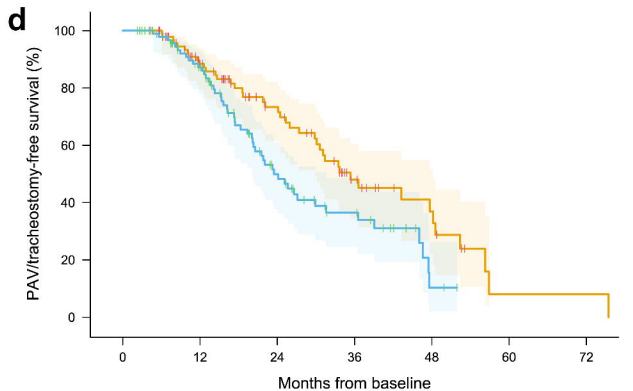

Plasma miR-181a\*b > 24590 UMIs

|       |     |    |    |    |   |   |
|-------|-----|----|----|----|---|---|
| 0, 0) | 68  | 41 | 18 | 9  | 1 | 1 |
| 0, 1) | 101 | 68 | 30 | 15 | 2 | 0 |
| 1, 1) | 100 | 71 | 30 | 15 | 2 | 0 |

Log-rank  $p = 0.016$
